# Supplementary material for: Rationalizing the formation of porosity in mechanochemically-synthesized polymers
Source: Royal Society of Chemistry journal article supplement (doi:10.1039/d3cp02128a), 2023-01-01
Supplement: d3cp02128a1.pdf [file d3cp02128a1.pdf]

## Supporting Information

### **Rationalizing the Formation of Porosity in Mechanochemically-Synthesized Polymers**

*Annika Krusenbaum, Steffi Krause Hinojosa, Sven Fabig, Valentin Becker, Sven Grätz, and  
Lars Borchardt\**

#### **Inhalt**

|                                        |    |
|----------------------------------------|----|
| 1. Materials .....                     | 2  |
| 2. Weights, Moles and Equivalents..... | 3  |
| 3. Polymer Matrix Overview .....       | 4  |
| 4. Characterization .....              | 11 |

## 1. Materials

The monomers Naphthalene (NT) (Sigma Aldrich, 99% purity), Anthracene (AT) (TCI, >97% purity), Tetracene (TT) (TCI, >97% purity), Biphenyl (BP) (Acros Organics, 99% purity), *p*-Terphenyl (TP) (abcr, 99% purity), *p*-Quaterphenyl (QT) (abcr, 98% purity), 1,1,2,2-Tetraphenylethylene (TePE) (Sigma Aldrich, 98% purity), 1,1,4,4-Tetraphenyl-1,3-butadiene (TePB) (Acros Organics, 99% purity), Triphenylamine (TPA) (TCI, >98% purity), 2,4,6-Triphenyl-1,3,5-triazine (TPT) (TCI, >98% purity), 1,3,5-Triphenylbenzene (TPB) (Sigma Aldrich, 97% purity), 1,3,5-Tris(*p*-biphenyl)benzene (TBB) (TCI, >98% purity), Triphenylmethane (TPM) (Sigma Aldrich, 99% purity), Tetraphenylmethane (TePM) (BLD Pharm, 97% purity), Benzene (BZ) (TCI, >99.5% purity), and Hexaphenylbenzene (HPB) (Sigma Aldrich, 98% purity), the liquid linkers 1,2-Dichloroethane (DCE) (Sigma Aldrich, 99.8% purity), 1,3-Dichloropropane (DCP) (Sigma Aldrich, 99% purity), 1,4-Dichlorobutane (DCB) (Sigma Aldrich, 99% purity), and Tetrachloromethane (CCl<sub>4</sub>) (Sigma Aldrich, >99.9% purity), the solid linkers 1,4-Bis(chloromethyl)benzene (BCMB) (Sigma Aldrich, 98% purity), 1,3,5-Tris(bromomethyl)benzene (TBMB) (Sigma Aldrich, 97% purity), and 1,2,4,5-Tetrakis(bromomethyl)benzene (TeBMB) (Sigma Aldrich, 95% purity), and the Lewis acid Aluminium(III)chloride (AlCl<sub>3</sub>) (anhydrous, Alfa Aesar, 98% purity) were purchased and used as received. The liquid linkers Dichloromethane (DCM) and Chloroform (CHCl<sub>3</sub>) were purchased in p.A quality and placed over 4Å molecular sieves. All chemicals were stored and used under inert gas atmosphere.

## 2. Weights, Moles and Equivalents

**Table S1.** Overview over the weights, moles and equivalents used for the polymerization with various monomers (top) and various liquid and solid linkers (bottom).

| Monomer                          | Abbreviation | Weight (g) | Moles (mmol) | Equivalents |
|----------------------------------|--------------|------------|--------------|-------------|
| Naphthalene                      | NT           | 0.209      | 1.63         | 1           |
| Anthracene                       | AT           | 0.291      | 1.63         | 1           |
| Tetracene                        | TT           | 0.372      | 1.63         | 1           |
| Biphenyl                         | BP           | 0.252      | 1.63         | 1           |
| <i>p</i> -Terphenyl              | TP           | 0.376      | 1.63         | 1           |
| <i>p</i> -Quaterphenyl           | QP           | 0.500      | 1.63         | 1           |
| Tetraphenylethylene              | TePE         | 0.542      | 1.63         | 1           |
| Tetraphenylbutadiene             | TePB         | 0.585      | 1.63         | 1           |
| Triphenylamine                   | TPA          | 0.400      | 1.63         | 1           |
| Triphenyltriazine                | TPT          | 0.505      | 1.63         | 1           |
| Triphenylbenzene                 | TPB          | 0.500      | 1.63         | 1           |
| Tris( <i>p</i> -biphenyl)benzene | TBB          | 0.872      | 1.63         | 1           |
| Triphenylmethane                 | TPM          | 0.399      | 1.63         | 1           |
| Tetraphenylmethane               | TePM         | 0.523      | 1.63         | 1           |
| Benzene                          | BZ           | 0.127      | 1.63         | 1           |
| Hexaphenylbenzene                | HPB          | 0.872      | 1.63         | 1           |

| Linker                       | Abbreviation      | Weight (g) | Moles (mmol) | Equivalents |
|------------------------------|-------------------|------------|--------------|-------------|
| Dichloromethane              | DCM               | 0.831      | 9.79         | 6           |
| Dichloroethane               | DCE               | 0.969      | 9.79         | 6           |
| Dichloropropane              | DCP               | 1.110      | 9.79         | 6           |
| Dichlorobutane               | DCB               | 1.240      | 9.79         | 6           |
| Bis(chloromethyl)benzene     | BCMB              | 0.286      | 1.63         | 1           |
| Chloroform                   | CHCl <sub>3</sub> | 1.170      | 9.79         | 6           |
| Tris(bromomethyl)benzene     | TBMB              | 0.582      | 1.63         | 1           |
| Tetrachloromethane           | CCl <sub>4</sub>  | 1.510      | 9.79         | 6           |
| Tetrakis(bromomethyl)benzene | TeBMB             | 0.734      | 1.63         | 1           |

### 3. Polymer Matrix Overview

**Table S2.** Overview over the yield, specific surface area ( $SSA_{BET}$ ) and the total pore volume ( $V_{total}$ ) at  $P/P_0 = 0.95$  for porous polymers obtained during the mechanochemical reaction of **Naphthalene**, **Anthracene** and **Tetracene** and various linkers. All reactions were proceeded at 30 Hz for 60 min in a MM500 mixer mill using  $ZrO_2$  as milling material and  $AlCl_3$  as Lewis acid and as bulking material.

| Polymer                    | Monomer     | Linker                       | Yield (%) | $SSA_{BET}$<br>( $m^2/g$ ) | $V_{total}$ ( $cm^3/g$ ) |
|----------------------------|-------------|------------------------------|-----------|----------------------------|--------------------------|
| <b>NT-DCM</b>              | Naphthalene | Dichloromethane              | 74        | 380                        | 0.23                     |
| <b>NT-DCE</b>              | Naphthalene | Dichloroethane               | >99       | 57                         | 0.05                     |
| <b>NT-DCP</b>              | Naphthalene | Dichloropropane              | 65        | 8                          | 0.02                     |
| <b>NT-DCB</b>              | Naphthalene | Dichlorobutane               | 37        | 0                          | 0.00                     |
| <b>NT-BCMB</b>             | Naphthalene | Bis(chloromethyl)benzene     | 57        | 49                         | 0.09                     |
| <b>NT-CHCl<sub>3</sub></b> | Naphthalene | Chloroform                   | 55        | 762                        | 0.43                     |
| <b>NT-TBMB</b>             | Naphthalene | Tris(bromomethyl)benzene     | >99       | 0                          | 0.00                     |
| <b>NT-CCl<sub>4</sub></b>  | Naphthalene | Tetrachloromethane           | 78        | 327                        | 0.24                     |
| <b>NT-TeBMB</b>            | Naphthalene | Tetrakis(bromomethyl)benzene | 99        | 253                        | 0.20                     |
| <b>AT-DCM</b>              | Anthracene  | Dichloromethane              | 54        | 101                        | 0.23                     |
| <b>AT-DCE</b>              | Anthracene  | Dichloroethane               | 25        | 32                         | 0.07                     |
| <b>AT-DCP</b>              | Anthracene  | Dichloropropane              | 11        | 6                          | 0.01                     |
| <b>AT-DCB</b>              | Anthracene  | Dichlorobutane               | 0         | 0                          | 0.00                     |
| <b>AT-BCMB</b>             | Anthracene  | Bis(chloromethyl)benzene     | 39        | 77                         | 0.13                     |
| <b>AT-CHCl<sub>3</sub></b> | Anthracene  | Chloroform                   | 87        | 622                        | 0.34                     |
| <b>AT-TBMB</b>             | Anthracene  | Tris(bromomethyl)benzene     | >99       | 37                         | 0.09                     |
| <b>AT-CCl<sub>4</sub></b>  | Anthracene  | Tetrachloromethane           | 45        | 306                        | -                        |
| <b>AT-TeBMB</b>            | Anthracene  | Tetrakis(bromomethyl)benzene | 90        | 25                         | 0.02                     |
| <b>TT-DCM</b>              | Tetracene   | Dichloromethane              | >99       | 663                        | 0.44                     |
| <b>TT-DCE</b>              | Tetracene   | Dichloroethane               | >99       | 305                        | -                        |
| <b>TT-DCP</b>              | Tetracene   | Dichloropropane              | 80        | 174                        | 0.22                     |
| <b>TT-DCB</b>              | Tetracene   | Dichlorobutane               | 14        | 31                         | 0.09                     |
| <b>TT-BCMB</b>             | Tetracene   | Bis(chloromethyl)benzene     | 87        | 30                         | 0.07                     |
| <b>TT-CHCl<sub>3</sub></b> | Tetracene   | Chloroform                   | 91        | 813                        | 0.56                     |
| <b>TT-TBMB</b>             | Tetracene   | Tris(bromomethyl)benzene     | 56        | 44                         | 0.13                     |
| <b>TT-CCl<sub>4</sub></b>  | Tetracene   | Tetrachloromethane           | 85        | 107                        | 0.11                     |
| <b>TT-TeBMB</b>            | Tetracene   | Tetrakis(bromomethyl)benzene | 98        | 6                          | 0.01                     |

**Table S3.** Overview over the yield, specific surface area ( $SSA_{BET}$ ) and the total pore volume ( $V_{total}$ ) at  $P/P_0 = 0.95$  for porous polymers obtained during the mechanochemical reaction of **Biphenyl**, ***p*-Terphenyl** and ***p*-Quaterphenyl** and various linkers. All reactions were proceeded at 30 Hz for 60 min in a MM500 mixer mill using  $ZrO_2$  as milling material and  $AlCl_3$  as Lewis acid and as bulking material.

| Polymer                    | Monomer                | Linker                       | Yield (%) | $SSA_{BET}$<br>( $m^2/g$ ) | $V_{total}$ ( $cm^3/g$ ) |
|----------------------------|------------------------|------------------------------|-----------|----------------------------|--------------------------|
| <b>BP-DCM</b>              | Biphenyl               | Dichloromethane              | 67        | 335                        | 0.27                     |
| <b>BP-DCE</b>              | Biphenyl               | Dichloroethane               | 79        | 30                         | 0.02                     |
| <b>BP-DCP</b>              | Biphenyl               | Dichloropropane              | 45        | 19                         | 0.03                     |
| <b>BP-DCB</b>              | Biphenyl               | Dichlorobutane               | 0         | 0                          | 0.00                     |
| <b>BP-BCMB</b>             | Biphenyl               | Bis(chloromethyl)benzene     | 12        | 39                         | 0.09                     |
| <b>BP-CHCl<sub>3</sub></b> | Biphenyl               | Chloroform                   | 89        | 804                        | 0.43                     |
| <b>BP-TBMB</b>             | Biphenyl               | Tris(bromomethyl)benzene     | 36        | 7                          | 0.10                     |
| <b>BP-CCl<sub>4</sub></b>  | Biphenyl               | Tetrachloromethane           | 91        | 304                        | 0.25                     |
| <b>BP-TeBMB</b>            | Biphenyl               | Tetrakis(bromomethyl)benzene | 71        | 10                         | 0.02                     |
| <b>TP-DCM</b>              | <i>p</i> -Terphenyl    | Dichloromethane              | 79        | 796                        | 0.53                     |
| <b>TP-DCE</b>              | <i>p</i> -Terphenyl    | Dichloroethane               | 86        | 393                        | 0.28                     |
| <b>TP-DCP</b>              | <i>p</i> -Terphenyl    | Dichloropropane              | 49        | 72                         | 0.15                     |
| <b>TP-DCB</b>              | <i>p</i> -Terphenyl    | Dichlorobutane               | 26        | 0                          | 0.00                     |
| <b>TP-BCMB</b>             | <i>p</i> -Terphenyl    | Bis(chloromethyl)benzene     | 46        | 5                          | 0.01                     |
| <b>TP-CHCl<sub>3</sub></b> | <i>p</i> -Terphenyl    | Chloroform                   | >99       | 935                        | 0.53                     |
| <b>TP-TBMB</b>             | <i>p</i> -Terphenyl    | Tris(bromomethyl)benzene     | 53        | 15                         | 0.03                     |
| <b>TP-CCl<sub>4</sub></b>  | <i>p</i> -Terphenyl    | Tetrachloromethane           | >99       | 592                        | 0.35                     |
| <b>TP-TeBMB</b>            | <i>p</i> -Terphenyl    | Tetrakis(bromomethyl)benzene | 67        | 40                         | 0.14                     |
| <b>QP-DCM</b>              | <i>p</i> -Quaterphenyl | Dichloromethane              | >99       | 493                        | 0.28                     |
| <b>QP-DCE</b>              | <i>p</i> -Quaterphenyl | Dichloroethane               | >99       | 367                        | 0.26                     |
| <b>QP-DCP</b>              | <i>p</i> -Quaterphenyl | Dichloropropane              | 59        | 23                         | 0.06                     |
| <b>QP-DCB</b>              | <i>p</i> -Quaterphenyl | Dichlorobutane               | 35        | 0                          | 0.00                     |
| <b>QP-BCMB</b>             | <i>p</i> -Quaterphenyl | Bis(chloromethyl)benzene     | 35        | 21                         | 0.04                     |
| <b>QP-CHCl<sub>3</sub></b> | <i>p</i> -Quaterphenyl | Chloroform                   | >99       | 878                        | 0.52                     |
| <b>QP-TBMB</b>             | <i>p</i> -Quaterphenyl | Tris(bromomethyl)benzene     | 62        | 51                         | 0.14                     |
| <b>QP-CCl<sub>4</sub></b>  | <i>p</i> -Quaterphenyl | Tetrachloromethane           | >99       | 600                        | 0.34                     |
| <b>QP-TeBMB</b>            | <i>p</i> -Quaterphenyl | Tetrakis(bromomethyl)benzene | 73        | 62                         | 0.19                     |

**Table S4.** Overview over the yield, specific surface area ( $SSA_{BET}$ ) and the total pore volume ( $V_{total}$ ) at  $P/P_0 = 0.95$  for porous polymers obtained during the mechanochemical reaction of **Tetraphenylethylene** and **Tetraphenylbutadiene** and various linkers. All reactions were proceeded at 30 Hz for 60 min in a MM500 mixer mill using  $ZrO_2$  as milling material and  $AlCl_3$  as Lewis acid and as bulking material.

| Polymer                      | Monomer              | Linker                       | Yield (%) | $SSA_{BET}$<br>( $m^2/g$ ) | $V_{total}$ ( $cm^3/g$ ) |
|------------------------------|----------------------|------------------------------|-----------|----------------------------|--------------------------|
| <b>TePE-DCM</b>              | Tetraphenylethylene  | Dichloromethane              | 97        | 261                        | 0.20                     |
| <b>TePE-DCE</b>              | Tetraphenylethylene  | Dichloroethane               | >99       | 105                        | 0.13                     |
| <b>TePE-DCP</b>              | Tetraphenylethylene  | Dichloropropane              | 66        | 0                          | 0.00                     |
| <b>TePE-DCB</b>              | Tetraphenylethylene  | Dichlorobutane               | 32        | 0                          | 0.00                     |
| <b>TePE-BCMB</b>             | Tetraphenylethylene  | Bis(chloromethyl)benzene     | 36        | 21                         | 0.04                     |
| <b>TePE-CHCl<sub>3</sub></b> | Tetraphenylethylene  | Chloroform                   | >99       | 940                        | 0.51                     |
| <b>TePE-TBMB</b>             | Tetraphenylethylene  | Tris(bromomethyl)benzene     | 50        | 22                         | 0.05                     |
| <b>TePE-CCl<sub>4</sub></b>  | Tetraphenylethylene  | Tetrachloromethane           | >99       | 370                        | -                        |
| <b>TePE-TeBMB</b>            | Tetraphenylethylene  | Tetrakis(bromomethyl)benzene | 66        | 61                         | 0.14                     |
| <b>TePB-DCM</b>              | Tetraphenylbutadiene | Dichloromethane              | >99       | 38                         | 0.08                     |
| <b>TePB-DCE</b>              | Tetraphenylbutadiene | Dichloroethane               | 96        | 19                         | 0.03                     |
| <b>TePB-DCP</b>              | Tetraphenylbutadiene | Dichloropropane              | 56        | 28                         | 0.09                     |
| <b>TePB-DCB</b>              | Tetraphenylbutadiene | Dichlorobutane               | 12        | 0                          | 0.00                     |
| <b>TePB-BCMB</b>             | Tetraphenylbutadiene | Bis(chloromethyl)benzene     | 42        | 0                          | 0.00                     |
| <b>TePB-CHCl<sub>3</sub></b> | Tetraphenylbutadiene | Chloroform                   | 94        | 429                        | 0.28                     |
| <b>TePB-TBMB</b>             | Tetraphenylbutadiene | Tris(bromomethyl)benzene     | 40        | 11                         | 0.02                     |
| <b>TePB-CCl<sub>4</sub></b>  | Tetraphenylbutadiene | Tetrachloromethane           | >99       | 51                         | 0.05                     |
| <b>TePB-TeBMB</b>            | Tetraphenylbutadiene | Tetrakis(bromomethyl)benzene | 53        | 13                         | 0.03                     |

**Table S5.** Overview over the yield, specific surface area ( $SSA_{BET}$ ) and the total pore volume ( $V_{total}$ ) at  $P/P_0 = 0.95$  for porous polymers obtained during the mechanochemical reaction of **Triphenylamine** and **Triphenyltriazine** and various linkers. All reactions were proceeded at 30 Hz for 60 min in a MM500 mixer mill using  $ZrO_2$  as milling material and  $AlCl_3$  as Lewis acid and as bulking material.

| Polymer                     | Monomer           | Linker                       | Yield (%) | $SSA_{BET}$<br>( $m^2/g$ ) | $V_{total}$ ( $cm^3/g$ ) |
|-----------------------------|-------------------|------------------------------|-----------|----------------------------|--------------------------|
| <b>TPA-DCM</b>              | Triphenylamine    | Dichloromethane              | 34        | 54                         | 0.10                     |
| <b>TPA-DCE</b>              | Triphenylamine    | Dichloroethane               | 10        | 6                          | 0.01                     |
| <b>TPA-DCP</b>              | Triphenylamine    | Dichloropropane              | 43        | 7                          | 0.01                     |
| <b>TPA-DCB</b>              | Triphenylamine    | Dichlorobutane               | 9         | 0                          | 0.00                     |
| <b>TPA-BCMB</b>             | Triphenylamine    | Bis(chloromethyl)benzene     | 40        | 54                         | 0.09                     |
| <b>TPA-CHCl<sub>3</sub></b> | Triphenylamine    | Chloroform                   | >99       | 165                        | 0.11                     |
| <b>TPA-TBMB</b>             | Triphenylamine    | Tris(bromomethyl)benzene     | 46        | 0                          | 0.00                     |
| <b>TPA-CCl<sub>4</sub></b>  | Triphenylamine    | Tetrachloromethane           | 68        | 14                         | 0.02                     |
| <b>TPA-TeBMB</b>            | Triphenylamine    | Tetrakis(bromomethyl)benzene | >99       | 0                          | 0.00                     |
| <b>TPT-DCM</b>              | Triphenyltriazine | Dichloromethane              | 55        | 18                         | 0.05                     |
| <b>TPT-DCE</b>              | Triphenyltriazine | Dichloroethane               | 33        | 29                         | 0.12                     |
| <b>TPT-DCP</b>              | Triphenyltriazine | Dichloropropane              | 25        | 16                         | 0.03                     |
| <b>TPT-DCB</b>              | Triphenyltriazine | Dichlorobutane               | 27        | 0                          | 0.00                     |
| <b>TPT-BCMB</b>             | Triphenyltriazine | Bis(chloromethyl)benzene     | 71        | 18                         | 0.04                     |
| <b>TPT-CHCl<sub>3</sub></b> | Triphenyltriazine | Chloroform                   | 86        | 47                         | 0.09                     |
| <b>TPT-TBMB</b>             | Triphenyltriazine | Tris(bromomethyl)benzene     | 90        | 22                         | 0.05                     |
| <b>TPT-CCl<sub>4</sub></b>  | Triphenyltriazine | Tetrachloromethane           | 45        | 13                         | 0.02                     |
| <b>TPT-TeBMB</b>            | Triphenyltriazine | Tetrakis(bromomethyl)benzene | 83        | 15                         | 0.04                     |

**Table S6.** Overview over the yield, specific surface area ( $SSA_{BET}$ ) and the total pore volume ( $V_{total}$ ) at  $P/P_0 = 0.95$  for porous polymers obtained during the mechanochemical reaction of **Triphenylbenzene** and **Tris(*p*-biphenyl)benzene** and various linkers. All reactions were proceeded at 30 Hz for 60 min in a MM500 mixer mill using  $ZrO_2$  as milling material and  $AlCl_3$  as Lewis acid and as bulking material.

| Polymer                     | Monomer                          | Linker                       | Yield (%) | $SSA_{BET}$<br>( $m^2/g$ ) | $V_{total}$ ( $cm^3/g$ ) |
|-----------------------------|----------------------------------|------------------------------|-----------|----------------------------|--------------------------|
| <b>TPB-DCM</b>              | Triphenylbenzene                 | Dichloromethane              | 95        | 1220                       | 0.76                     |
| <b>TPB-DCE</b>              | Triphenylbenzene                 | Dichloroethane               | 89        | 704                        | 0.32                     |
| <b>TPB-DCP</b>              | Triphenylbenzene                 | Dichloropropane              | >99       | 34                         | 0.05                     |
| <b>TPB-DCB</b>              | Triphenylbenzene                 | Dichlorobutane               | 10        | 0                          | 0.00                     |
| <b>TPB-BCMB</b>             | Triphenylbenzene                 | Bis(chloromethyl)benzene     | 28        | 59                         | 0.14                     |
| <b>TPB-CHCl<sub>3</sub></b> | Triphenylbenzene                 | Chloroform                   | >99       | 1310                       | 0.68                     |
| <b>TPB-TBMB</b>             | Triphenylbenzene                 | Tris(bromomethyl)benzene     | 45        | 492                        | 0.31                     |
| <b>TPB-CCl<sub>4</sub></b>  | Triphenylbenzene                 | Tetrachloromethane           | >99       | 440                        | 0.27                     |
| <b>TPB-TeBMB</b>            | Triphenylbenzene                 | Tetrakis(bromomethyl)benzene | >99       | 23                         | 0.06                     |
| <b>TBB-DCM</b>              | Tris( <i>p</i> -biphenyl)benzene | Dichloromethane              | 84        | 1153                       | 0.65                     |
| <b>TBB-DCE</b>              | Tris( <i>p</i> -biphenyl)benzene | Dichloroethane               | >99       | 341                        | 0.22                     |
| <b>TBB-DCP</b>              | Tris( <i>p</i> -biphenyl)benzene | Dichloropropane              | >99       | 129                        | 0.18                     |
| <b>TBB-DCB</b>              | Tris( <i>p</i> -biphenyl)benzene | Dichlorobutane               | 41        | 7                          | 0.01                     |
| <b>TBB-BCMB</b>             | Tris( <i>p</i> -biphenyl)benzene | Bis(chloromethyl)benzene     | 37        | 0                          | 0.11                     |
| <b>TBB-CHCl<sub>3</sub></b> | Tris( <i>p</i> -biphenyl)benzene | Chloroform                   | >99       | 1052                       | 0.54                     |
| <b>TBB-TBMB</b>             | Tris( <i>p</i> -biphenyl)benzene | Tris(bromomethyl)benzene     | 48        | 0                          | 0.10                     |
| <b>TBB-CCl<sub>4</sub></b>  | Tris( <i>p</i> -biphenyl)benzene | Tetrachloromethane           | >99       | 650                        | 0.36                     |
| <b>TBB-TeBMB</b>            | Tris( <i>p</i> -biphenyl)benzene | Tetrakis(bromomethyl)benzene | 70        | 222                        | 0.33                     |

**Table S7.** Overview over the yield, specific surface area ( $SSA_{BET}$ ) and the total pore volume ( $V_{total}$ ) at  $P/P_0 = 0.95$  for porous polymers obtained during the mechanochemical reaction of **Triphenylmethane** and **Tetraphenylmethane** and various linkers. All reactions were proceeded at 30 Hz for 60 min in a MM500 mixer mill using  $ZrO_2$  as milling material and  $AlCl_3$  as Lewis acid and as bulking material.

| Polymer                      | Monomer            | Linker                       | Yield (%) | $SSA_{BET}$<br>( $m^2/g$ ) | $V_{total}$ ( $cm^3/g$ ) |
|------------------------------|--------------------|------------------------------|-----------|----------------------------|--------------------------|
| <b>TPM-DCM</b>               | Triphenylmethane   | Dichloromethane              | 54        | 3                          | 0.01                     |
| <b>TPM-DCE</b>               | Triphenylmethane   | Dichloroethane               | >99       | 37                         | 0.05                     |
| <b>TPM-DCP</b>               | Triphenylmethane   | Dichloropropane              | 22        | 0                          | 0.00                     |
| <b>TPM-DCB</b>               | Triphenylmethane   | Dichlorobutane               | 0         | 0                          | 0.00                     |
| <b>TPM-BCMB</b>              | Triphenylmethane   | Bis(chloromethyl)benzene     | 24        | 0                          | 0.15                     |
| <b>TPM-CHCl<sub>3</sub></b>  | Triphenylmethane   | Chloroform                   | >99       | 33                         | 0.07                     |
| <b>TPM-TBMB</b>              | Triphenylmethane   | Tris(bromomethyl)benzene     | 33        | 32                         | 0.09                     |
| <b>TPM-CCl<sub>4</sub></b>   | Triphenylmethane   | Tetrachloromethane           | 0         | 0                          | 0.00                     |
| <b>TPM-TeBMB</b>             | Triphenylmethane   | Tetrakis(bromomethyl)benzene | 54        | 6                          | 0.01                     |
| <b>TePM-DCM</b>              | Tetraphenylmethane | Dichloromethane              | 19        | 16                         | 0.05                     |
| <b>TePM-DCE</b>              | Tetraphenylmethane | Dichloroethane               | 43        | 9                          | 0.01                     |
| <b>TePM-DCP</b>              | Tetraphenylmethane | Dichloropropane              | 1         | 0                          | 0.00                     |
| <b>TePM-DCB</b>              | Tetraphenylmethane | Dichlorobutane               | 0         | 0                          | 0.00                     |
| <b>TePM-BCMB</b>             | Tetraphenylmethane | Bis(chloromethyl)benzene     | 13        | 41                         | 0.11                     |
| <b>TePM-CHCl<sub>3</sub></b> | Tetraphenylmethane | Chloroform                   | 29        | 0                          | 0.00                     |
| <b>TePM-TBMB</b>             | Tetraphenylmethane | Tris(bromomethyl)benzene     | 31        | 7                          | 0.03                     |
| <b>TePM-CCl<sub>4</sub></b>  | Tetraphenylmethane | Tetrachloromethane           | 63        | 13                         | 0.03                     |
| <b>TePM-TeBMB</b>            | Tetraphenylmethane | Tetrakis(bromomethyl)benzene | 43        | 21                         | 0.04                     |

**Table S8.** Overview over the yield, specific surface area ( $SSA_{BET}$ ) and the total pore volume ( $V_{total}$ ) at  $P/P_0 = 0.95$  for porous polymers obtained during the mechanochemical reaction of **Benzene** and **Hexaphenylbenzene** and various linkers. All reactions were proceeded at 30 Hz for 60 min in a MM500 mixer mill using  $ZrO_2$  as milling material and  $AlCl_3$  as Lewis acid and as bulking material.

| Polymer                     | Monomer           | Linker                       | Yield (%) | $SSA_{BET}$<br>( $m^2/g$ ) | $V_{total}$ ( $cm^3/g$ ) |
|-----------------------------|-------------------|------------------------------|-----------|----------------------------|--------------------------|
| <b>BZ-DCM</b>               | Benzene           | Dichloromethane              | 23        | 14                         | 0.02                     |
| <b>BZ-DCE</b>               | Benzene           | Dichloroethane               | >99       | 39                         | 0.07                     |
| <b>BZ-DCP</b>               | Benzene           | Dichloropropane              | 5         | 0                          | 0.00                     |
| <b>BZ-DCB</b>               | Benzene           | Dichlorobutane               | 0         | 0                          | 0.00                     |
| <b>BZ-BCMB</b>              | Benzene           | Bis(chloromethyl)benzene     | 13        | 0                          | 0.00                     |
| <b>BZ-CHCl<sub>3</sub></b>  | Benzene           | Chloroform                   | 42        | 353                        | 0.22                     |
| <b>BZ-TBMB</b>              | Benzene           | Tris(bromomethyl)benzene     | 47        | 11                         | 0.03                     |
| <b>BZ-CCl<sub>4</sub></b>   | Benzene           | Tetrachloromethane           | 0         | 0                          | 0.00                     |
| <b>BZ-TeBMB</b>             | Benzene           | Tetrakis(bromomethyl)benzene | 82        | 63                         | 0.13                     |
| <b>HPB-DCM</b>              | Hexaphenylbenzene | Dichloromethane              | 82        | 1069                       | 0.67                     |
| <b>HPB-DCE</b>              | Hexaphenylbenzene | Dichloroethane               | >99       | 610                        | 0.34                     |
| <b>HPB-DCP</b>              | Hexaphenylbenzene | Dichloropropane              | 86        | 23                         | 0.03                     |
| <b>HPB-DCB</b>              | Hexaphenylbenzene | Dichlorobutane               | 37        | 54                         | 0.19                     |
| <b>HPB-BCMB</b>             | Hexaphenylbenzene | Bis(chloromethyl)benzene     | 89        | 87                         | 0.22                     |
| <b>HPB-CHCl<sub>3</sub></b> | Hexaphenylbenzene | Chloroform                   | >99       | 875                        | 0.46                     |
| <b>HPB-TBMB</b>             | Hexaphenylbenzene | Tris(bromomethyl)benzene     | 85        | 72                         | 0.16                     |
| <b>HPB-CCl<sub>4</sub></b>  | Hexaphenylbenzene | Tetrachloromethane           | >99       | 646                        | 0.38                     |
| <b>HPB-TeBMB</b>            | Hexaphenylbenzene | Tetrakis(bromomethyl)benzene | 93        | 0                          | 0.00                     |

**Table S9.** Overview over the yield, specific surface area ( $SSA_{BET}$ ) and the total pore volume ( $V_{total}$ ) at  $P/P_0 = 0.95$  for porous polymers obtained during the mechanochemical **self-polymerization (SP) of solid linkers**. All reactions were proceeded at 30 Hz for 60 min in a MM500 mixer mill using  $ZrO_2$  as milling material and  $AlCl_3$  as Lewis acid and as bulking material.

| Polymer         | Monomer | Linker                       | Yield (%) | $SSA_{BET}$<br>( $m^2/g$ ) | $V_{total}$ ( $cm^3/g$ ) |
|-----------------|---------|------------------------------|-----------|----------------------------|--------------------------|
| <b>SP-BCMB</b>  | -       | Bis(chloromethyl)benzene     | 90        | 86                         | 0.14                     |
| <b>SP-TBMB</b>  | -       | Tris(bromomethyl)benzene     | >99       | 706                        | 0.42                     |
| <b>SP-TeBMB</b> | -       | Tetrakis(bromomethyl)benzene | >99       | 207                        | 0.22                     |

## 4. Characterization

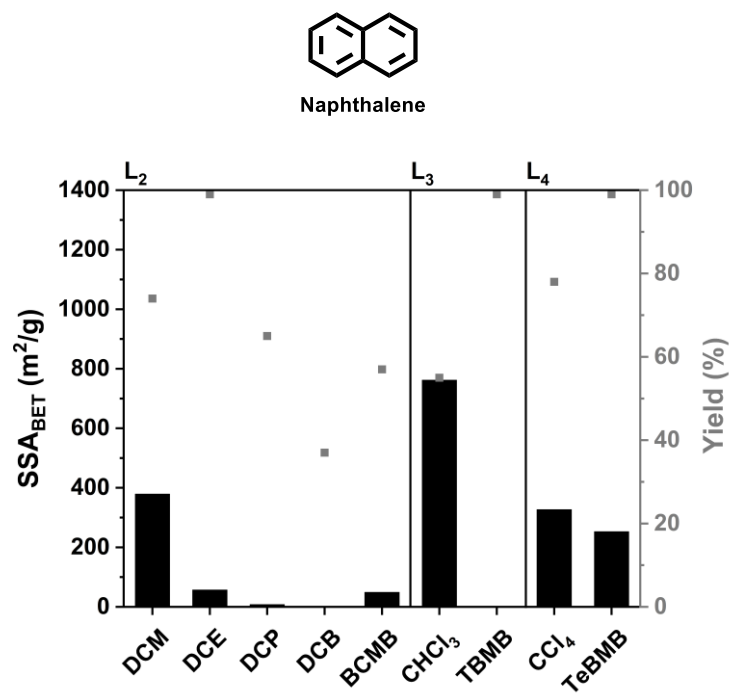

**Figure S1.** SSA<sub>BET</sub> (black bars) and yield (gray squares) for the polymerization of the monomer Naphthalene and various linkers. The linkers are divided into linkers with two linking points (L<sub>2</sub>), three linking points (L<sub>3</sub>) and four linking points (L<sub>4</sub>).

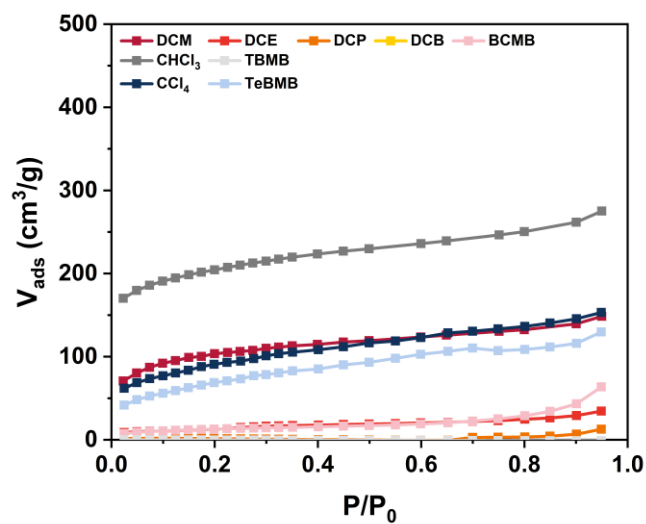

**Figure S2.** N<sub>2</sub> Physisorption measurements, showing the adsorption isotherms of polymers synthesized with Naphthalene as monomer and various linkers. The linkers used are: Dichloromethane (DCM; dark red), Dichloroethane (DCE, light red), Dichloropropane (DCP, orange), Dichlorobutane (DCB, yellow), Bis(chloromethyl)benzene (BCMB, pink), Chloroform (CHCl<sub>3</sub>, dark gray), Tris(bromomethyl)benzene (TBMB, light gray), Tetrachloromethane (CCl<sub>4</sub>, dark blue), and Tetrakis(bromomethyl)benzene (TeBMB, light blue).

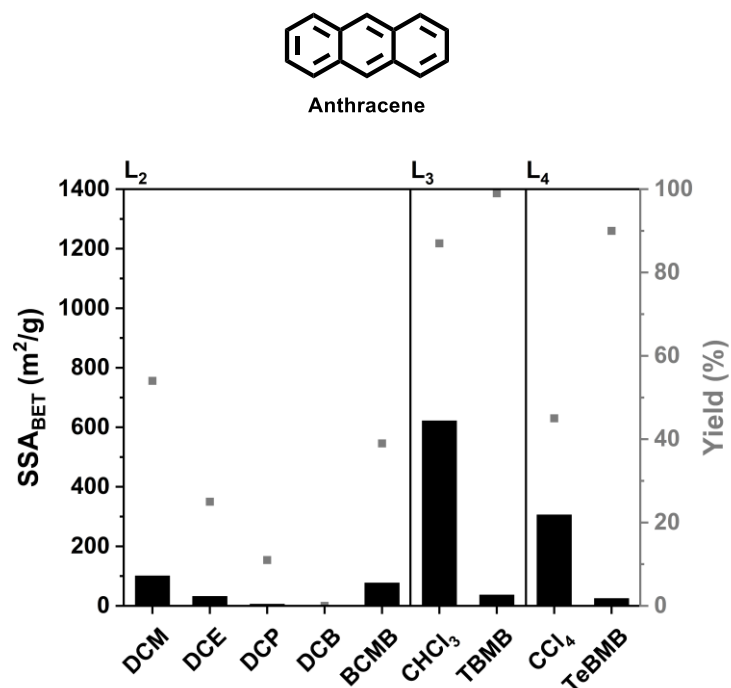

**Figure S3.** SSA<sub>BET</sub> (black bars) and yield (gray squares) for the polymerization of the monomer Anthracene and various linkers. The linkers are divided into linkers with two linking points (L<sub>2</sub>), three linking points (L<sub>3</sub>) and four linking points (L<sub>4</sub>).

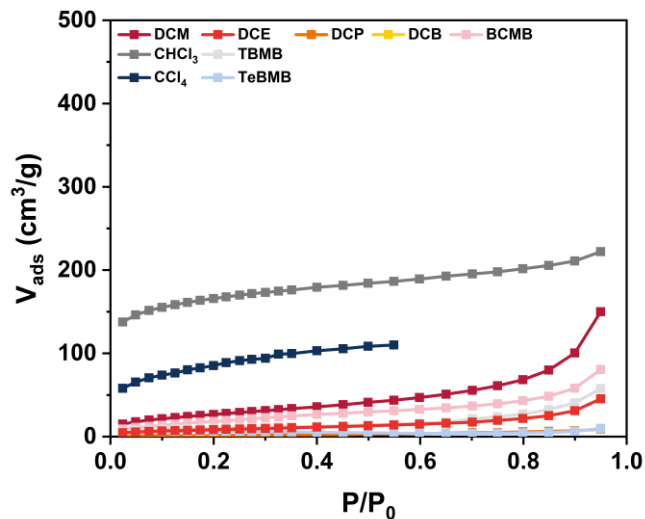

**Figure S4.** N<sub>2</sub> Physisorption measurements, showing the adsorption isotherms of polymers synthesized with Anthracene as monomer and various linkers. The linkers used are: Dichloromethane (DCM; dark red), Dichloroethane (DCE, light red), Dichloropropane (DCP, orange), Dichlorobutane (DCB, yellow), Bis(chloromethyl)benzene (BCMB, pink), Chloroform (CHCl<sub>3</sub>, dark gray), Tris(bromomethyl)benzene (TBMB, light gray), Tetrachloromethane (CCl<sub>4</sub>, dark blue), and Tetrakis(bromomethyl)benzene (TeBMB, light blue).

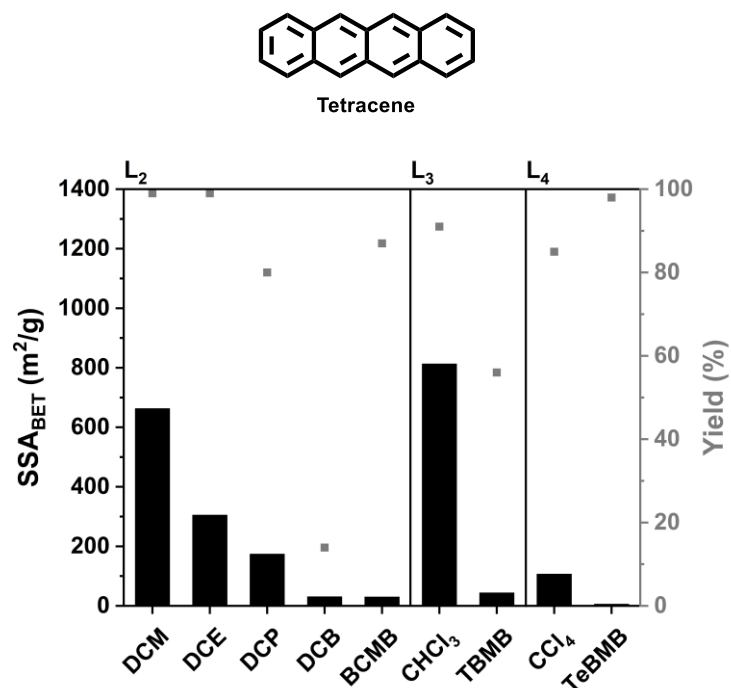

**Figure S5.** SSA<sub>BET</sub> (black bars) and yield (gray squares) for the polymerization of the monomer Tetracene and various linkers. The linkers are divided into linkers with two linking points (L<sub>2</sub>), three linking points (L<sub>3</sub>) and four linking points (L<sub>4</sub>).

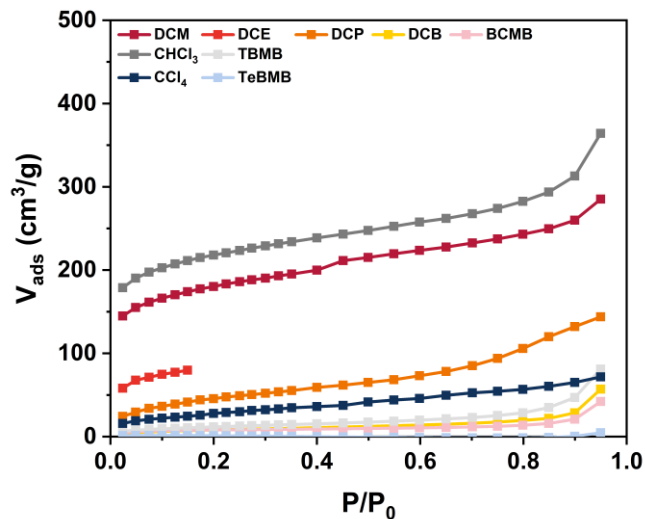

**Figure S6.** N<sub>2</sub> Physisorption measurements, showing the adsorption isotherms of polymers synthesized with Tetracene as monomer and various linkers. The linkers used are: Dichloromethane (DCM; dark red), Dichloroethane (DCE, light red), Dichloropropane (DCP, orange), Dichlorobutane (DCB, yellow), Bis(chloromethyl)benzene (BCMB, pink), Chloroform (CHCl<sub>3</sub>, dark gray), Tris(bromomethyl)benzene (TBMB, light gray), Tetrachloromethane (CCl<sub>4</sub>, dark blue), and Tetrakis(bromomethyl)benzene (TeBMB, light blue).

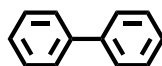

Biphenyl

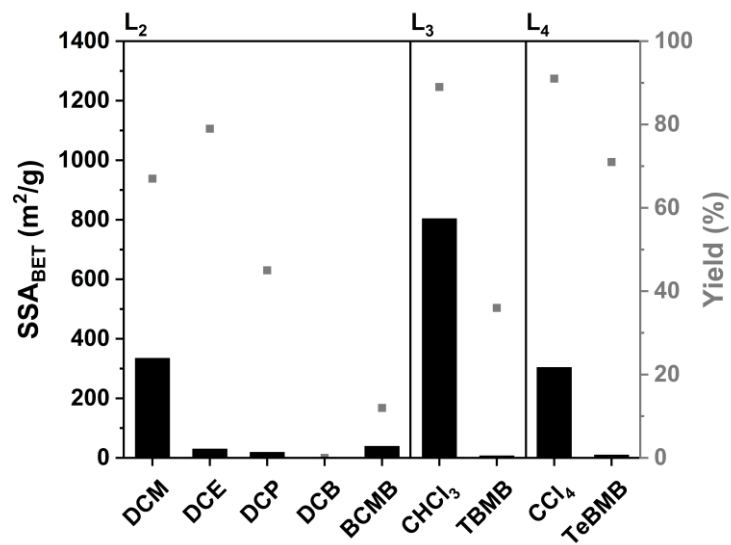

**Figure S7.** SSA<sub>BET</sub> (black bars) and yield (gray squares) for the polymerization of the monomer Biphenyl and various linkers. The linkers are divided into linkers with two linking points (L<sub>2</sub>), three linking points (L<sub>3</sub>) and four linking points (L<sub>4</sub>).

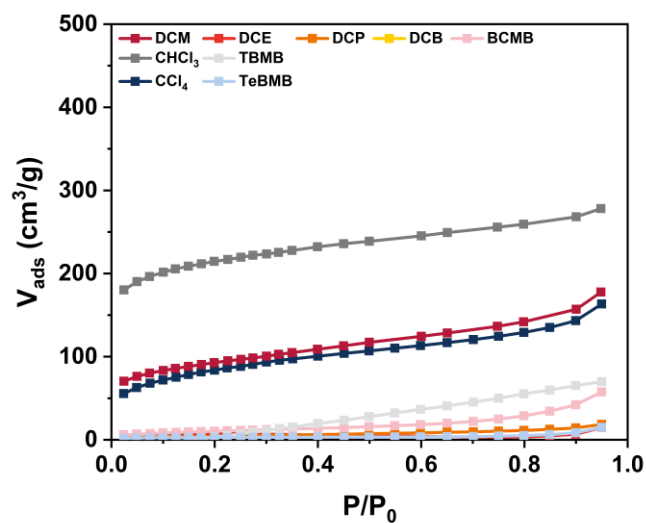

**Figure S8.** N<sub>2</sub> Physisorption measurements, showing the adsorption isotherms of polymers synthesized with Biphenyl as monomer and various linkers. The linkers used are: Dichloromethane (DCM; dark red), Dichloroethane (DCE, light red), Dichloropropane (DCP, orange), Dichlorobutane (DCB, yellow), Bis(chloromethyl)benzene (BCMB, pink), Chloroform (CHCl<sub>3</sub>, dark gray), Tris(bromomethyl)benzene (TBMB, light gray), Tetrachloromethane (CCl<sub>4</sub>, dark blue), and Tetrakis(bromomethyl)benzene (TeBMB, light blue).

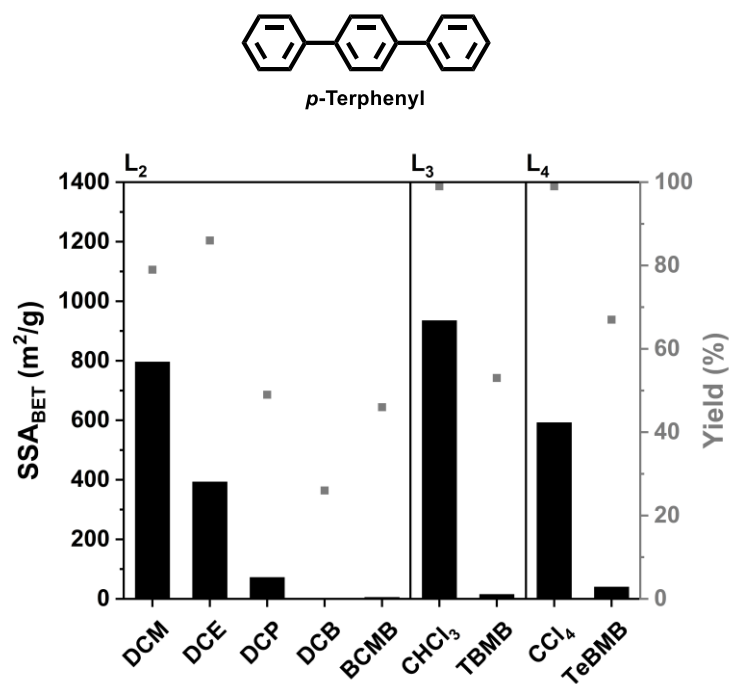

**Figure S9.** SSA<sub>BET</sub> (black bars) and yield (gray squares) for the polymerization of the monomer *p*-Terphenyl and various linkers. The linkers are divided into linkers with two linking points (L<sub>2</sub>), three linking points (L<sub>3</sub>) and four linking points (L<sub>4</sub>).

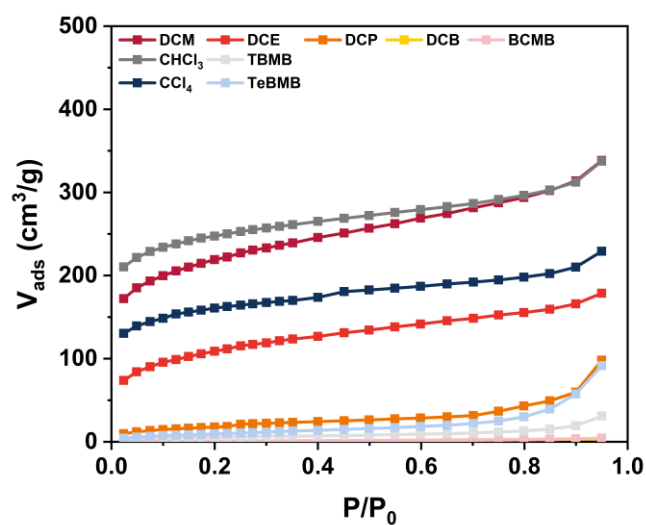

**Figure S10.** N<sub>2</sub> Physisorption measurements, showing the adsorption isotherms of polymers synthesized with *p*-Terphenyl as monomer and various linkers. The linkers used are: Dichloromethane (DCM; dark red), Dichloroethane (DCE, light red), Dichloropropane (DCP, orange), Dichlorobutane (DCB, yellow), Bis(chloromethyl)benzene (BCMB, pink), Chloroform (CHCl<sub>3</sub>, dark gray), Tris(bromomethyl)benzene (TBMB, light gray), Tetrachloromethane (CCl<sub>4</sub>, dark blue), and Tetrakis(bromomethyl)benzene (TeBMB, light blue).

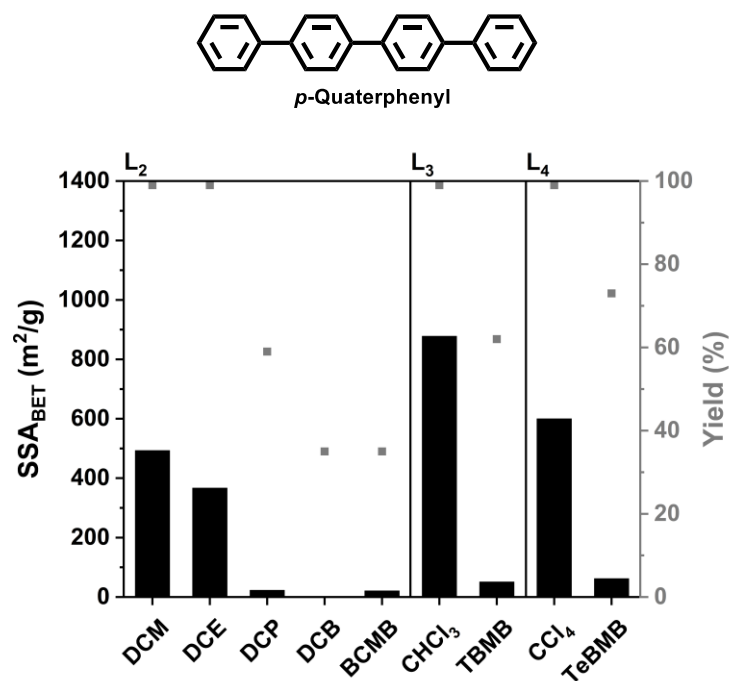

**Figure S11.** SSA<sub>BET</sub> (black bars) and yield (gray squares) for the polymerization of the monomer *p*-Quaterphenyl and various linkers. The linkers are divided into linkers with two linking points (L<sub>2</sub>), three linking points (L<sub>3</sub>) and four linking points (L<sub>4</sub>).

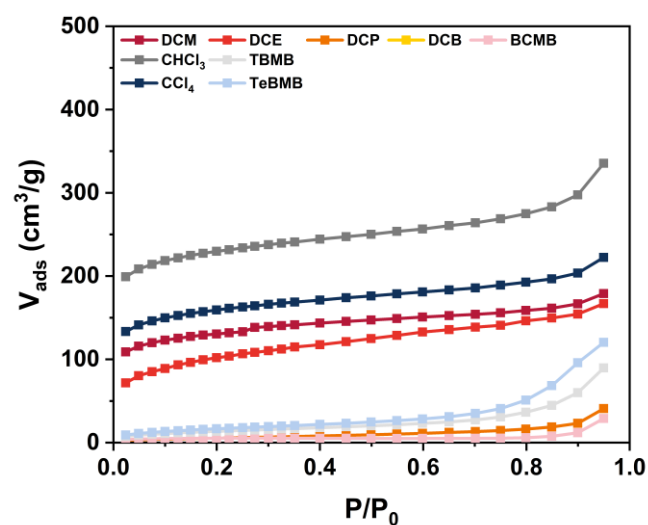

**Figure S12.** N<sub>2</sub> Physisorption measurements, showing the adsorption isotherms of polymers synthesized with *p*-Quaterphenyl as monomer and various linkers. The linkers used are: Dichloromethane (DCM; dark red), Dichloroethane (DCE, light red), Dichloropropane (DCP, orange), Dichlorobutane (DCB, yellow), Bis(chloromethyl)benzene (BCMB, pink), Chloroform (CHCl<sub>3</sub>, dark gray), Tris(bromomethyl)benzene (TBMB, light gray), Tetrachloromethane (CCl<sub>4</sub>, dark blue), and Tetrakis(bromomethyl)benzene (TeBMB, light blue).

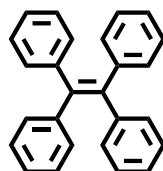

Tetraphenylethylene

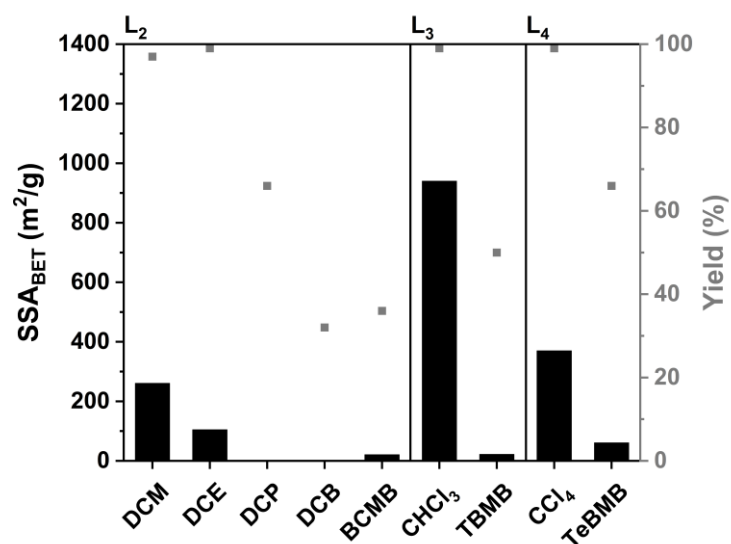

**Figure S13.** SSA<sub>BET</sub> (black bars) and yield (gray squares) for the polymerization of the monomer Tetraphenylethylene and various linkers. The linkers are divided into linkers with two linking points (L<sub>2</sub>), three linking points (L<sub>3</sub>) and four linking points (L<sub>4</sub>).

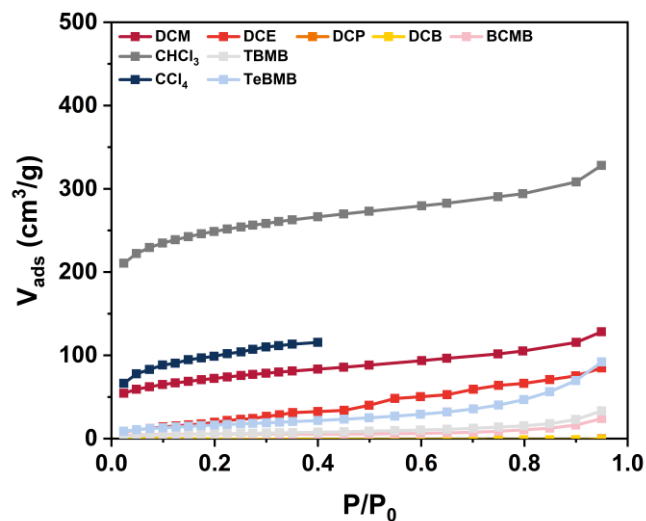

**Figure S14.** N<sub>2</sub> Physisorption measurements, showing the adsorption isotherms of polymers synthesized with Tetraphenylethylene as monomer and various linkers. The linkers used are: Dichloromethane (DCM; dark red), Dichloroethane (DCE, light red), Dichloropropane (DCP, orange), Dichlorobutane (DCB, yellow), Bis(chloromethyl)benzene (BCMB, pink), Chloroform (CHCl<sub>3</sub>, dark gray), Tris(bromomethyl)benzene (TBMB, light gray), Tetrachloromethane (CCl<sub>4</sub>, dark blue), and Tetrakis(bromomethyl)benzene (TeBMB, light blue).

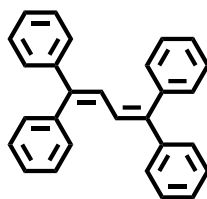

Tetraphenylbutadiene

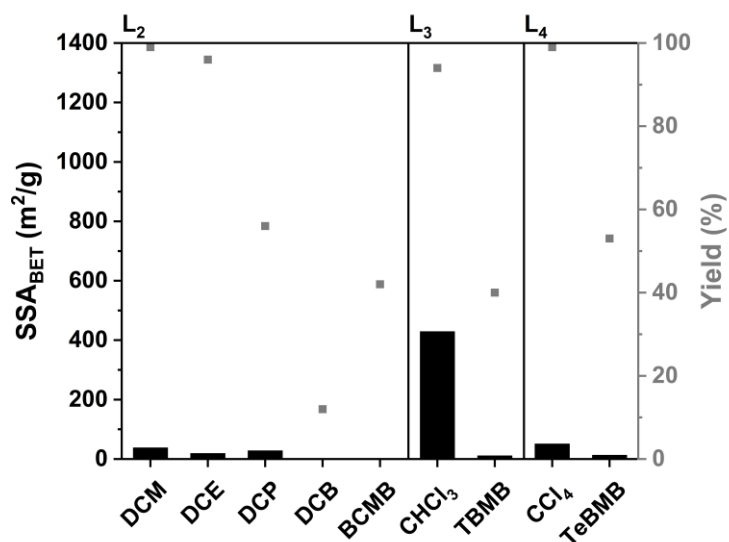

**Figure S15.** SSA<sub>BET</sub> (black bars) and yield (gray squares) for the polymerization of the monomer Tetraphenylbutadiene and various linkers. The linkers are divided into linkers with two linking points (L<sub>2</sub>), three linking points (L<sub>3</sub>) and four linking points (L<sub>4</sub>).

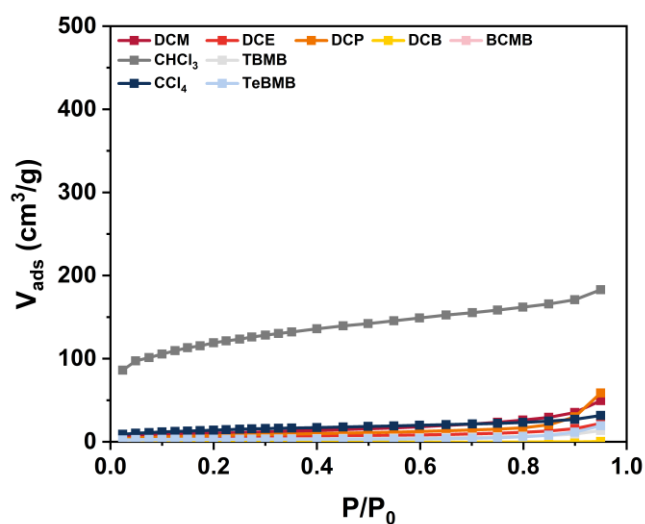

**Figure S16.** N<sub>2</sub> Physisorption measurements, showing the adsorption isotherms of polymers synthesized with Tetraphenylbutadiene as monomer and various linkers. The linkers used are: Dichloromethane (DCM; dark red), Dichloroethane (DCE, light red), Dichloropropane (DCP, orange), Dichlorobutane (DCB, yellow), Bis(chloromethyl)benzene (BCMB, pink), Chloroform (CHCl<sub>3</sub>, dark gray), Tris(bromomethyl)benzene (TBMB, light gray), Tetrachloromethane (CCl<sub>4</sub>, dark blue), and Tetrakis(bromomethyl)benzene (TeBMB, light blue).

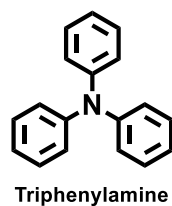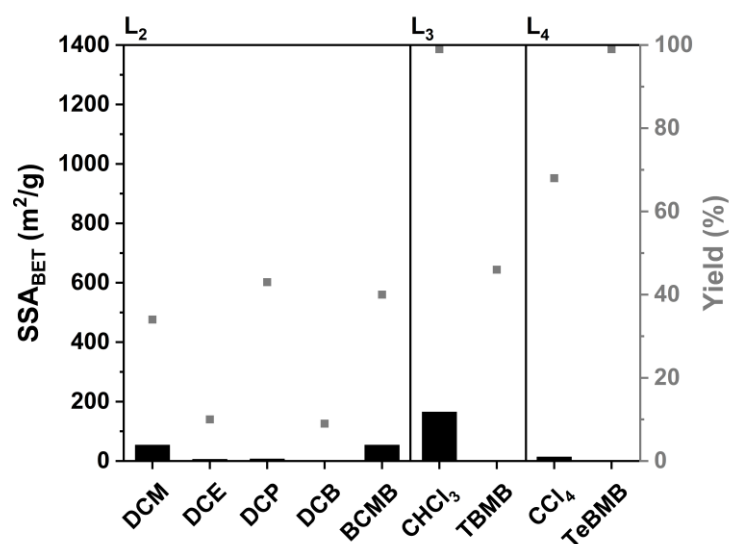

**Figure S17.** SSA<sub>BET</sub> (black bars) and yield (gray squares) for the polymerization of the monomer Triphenylamine and various linkers. The linkers are divided into linkers with two linking points (L<sub>2</sub>), three linking points (L<sub>3</sub>) and four linking points (L<sub>4</sub>).

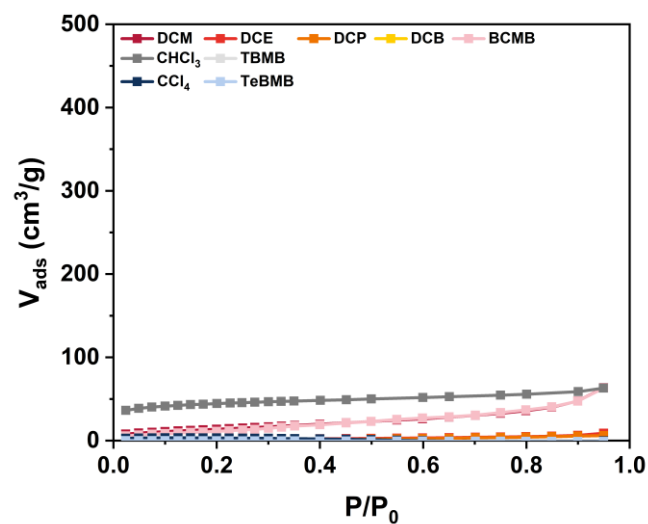

**Figure S18.** N<sub>2</sub> Physisorption measurements, showing the adsorption isotherms of polymers synthesized with Triphenylamine as monomer and various linkers. The linkers used are: Dichloromethane (DCM; dark red), Dichloroethane (DCE, light red), Dichloropropane (DCP, orange), Dichlorobutane (DCB, yellow), Bis(chloromethyl)benzene (BCMB, pink), Chloroform (CHCl<sub>3</sub>, dark gray), Tris(bromomethyl)benzene (TBMB, light gray), Tetrachloromethane (CCl<sub>4</sub>, dark blue), and Tetrakis(bromomethyl)benzene (TeBMB, light blue).

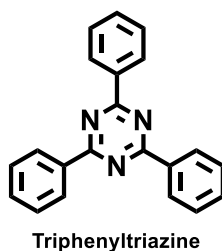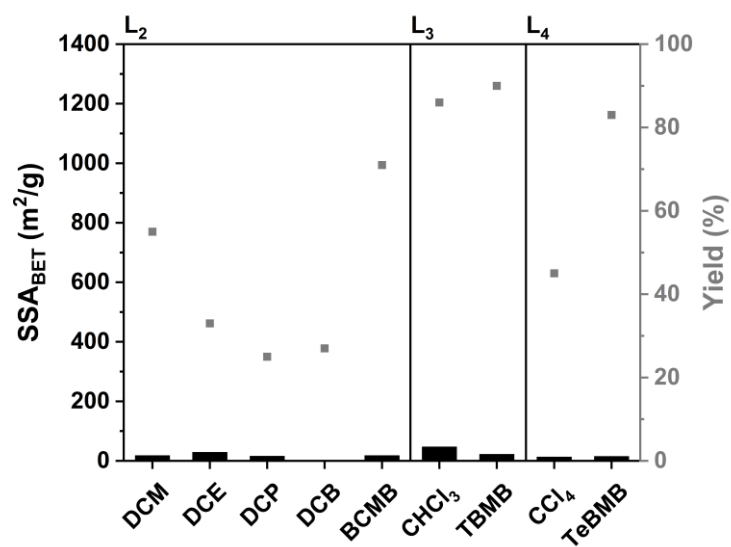

**Figure S19.** SSA<sub>BET</sub> (black bars) and yield (gray squares) for the polymerization of the monomer Triphenyltriazine and various linkers. The linkers are divided into linkers with two linking points (L<sub>2</sub>), three linking points (L<sub>3</sub>) and four linking points (L<sub>4</sub>).

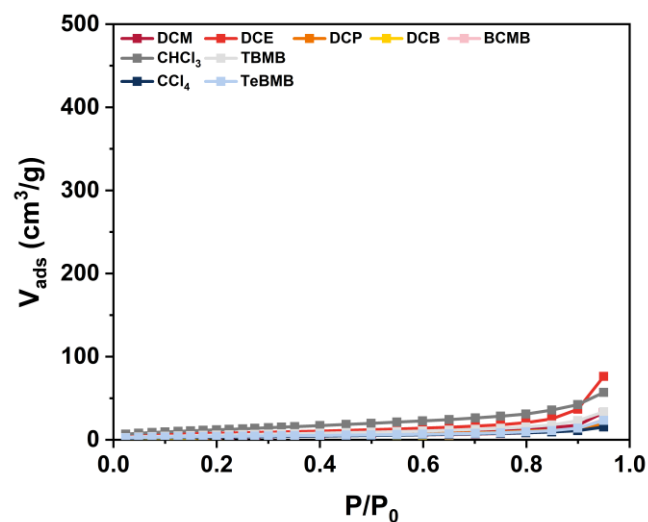

**Figure S20.** N<sub>2</sub> Physisorption measurements, showing the adsorption isotherms of polymers synthesized with Triphenyltriazine as monomer and various linkers. The linkers used are: Dichloromethane (DCM; dark red), Dichloroethane (DCE, light red), Dichloropropane (DCP, orange), Dichlorobutane (DCB, yellow), Bis(chloromethyl)benzene (BCMB, pink), Chloroform (CHCl<sub>3</sub>, dark gray), Tris(bromomethyl)benzene (TBMB, light gray), Tetrachloromethane (CCl<sub>4</sub>, dark blue), and Tetrakis(bromomethyl)benzene (TeBMB, light blue).

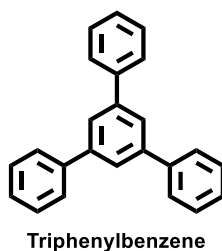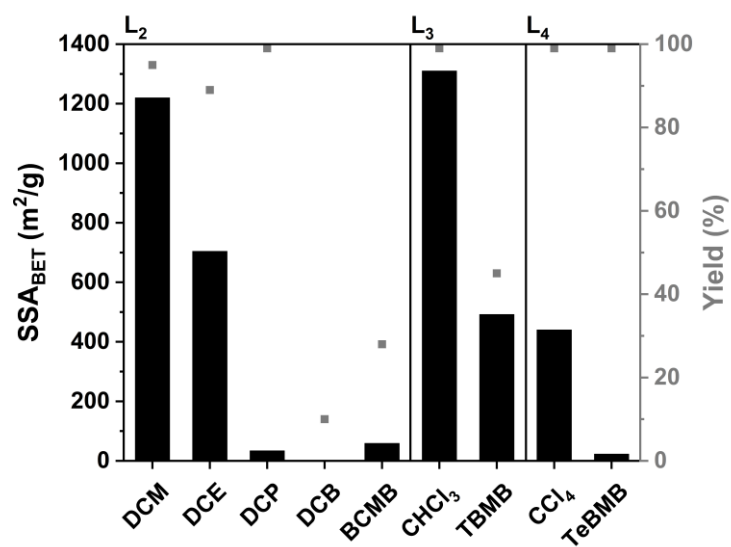

**Figure S21.** SSA<sub>BET</sub> (black bars) and yield (gray squares) for the polymerization of the monomer Triphenylbenzene and various linkers. The linkers are divided into linkers with two linking points (L<sub>2</sub>), three linking points (L<sub>3</sub>) and four linking points (L<sub>4</sub>).

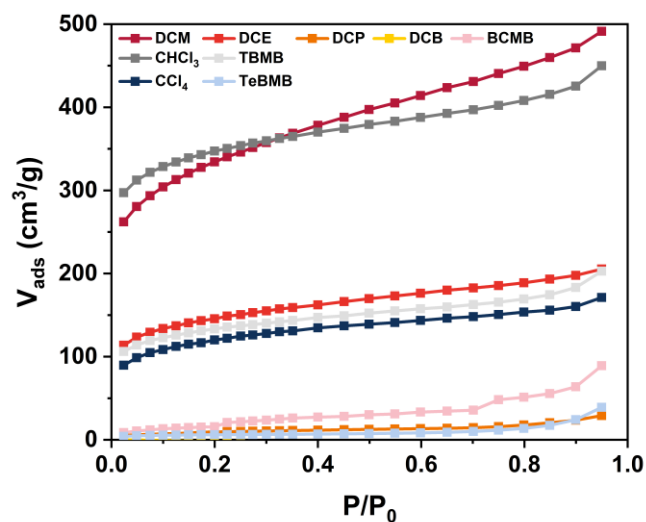

**Figure S22.** N<sub>2</sub> Physisorption measurements, showing the adsorption isotherms of polymers synthesized with Triphenylbenzene as monomer and various linkers. The linkers used are: Dichloromethane (DCM; dark red), Dichloroethane (DCE, light red), Dichloropropane (DCP, orange), Dichlorobutane (DCB, yellow), Bis(chloromethyl)benzene (BCMB, pink), Chloroform (CHCl<sub>3</sub>, dark gray), Tris(bromomethyl)benzene (TBMB, light gray), Tetrachloromethane (CCl<sub>4</sub>, dark blue), and Tetrakis(bromomethyl)benzene (TeBMB, light blue).

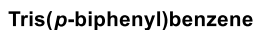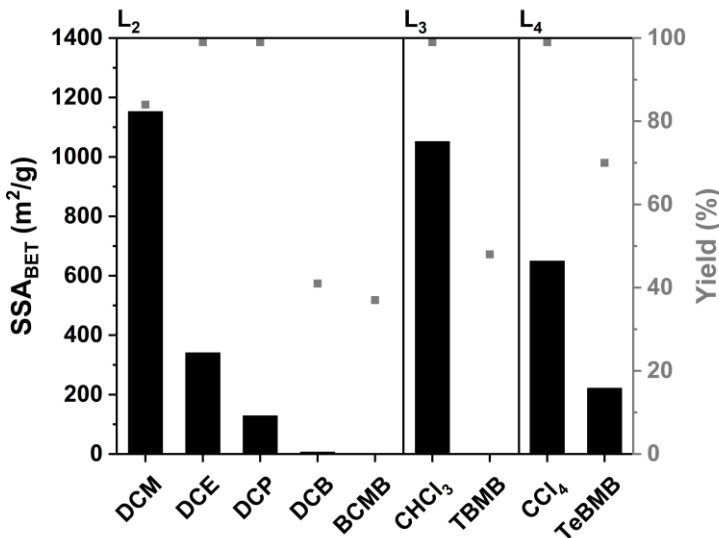

**Figure S23.** SS<sub>ABET</sub> (black bars) and yield (gray squares) for the polymerization of the monomer Tris(*p*-biphenyl)benzene and various linkers. The linkers are divided into linkers with two linking points (L<sub>2</sub>), three linking points (L<sub>3</sub>) and four linking points (L<sub>4</sub>).

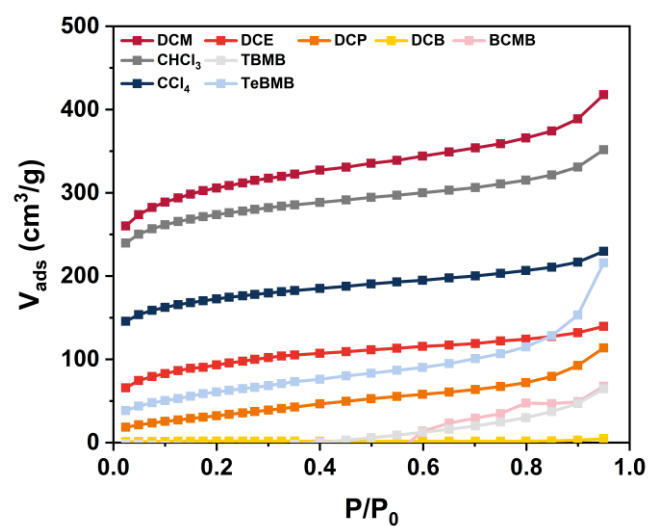

**Figure S24.** N<sub>2</sub> Physisorption measurements, showing the adsorption isotherms of polymers synthesized with Tris(*p*-biphenyl)benzene as monomer and various linkers. The linkers used are: Dichloromethane (DCM; dark red), Dichloroethane (DCE, light red), Dichloropropane (DCP, orange), Dichlorobutane (DCB, yellow), Bis(chloromethyl)benzene (BCMB, pink), Chloroform (CHCl<sub>3</sub>, dark gray), Tris(bromomethyl)benzene (TBMB, light gray), Tetrachloromethane (CCl<sub>4</sub>, dark blue), and Tetrakis(bromomethyl)benzene (TeBMB, light blue).

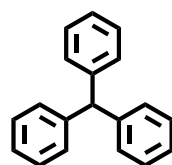

Triphenylmethane

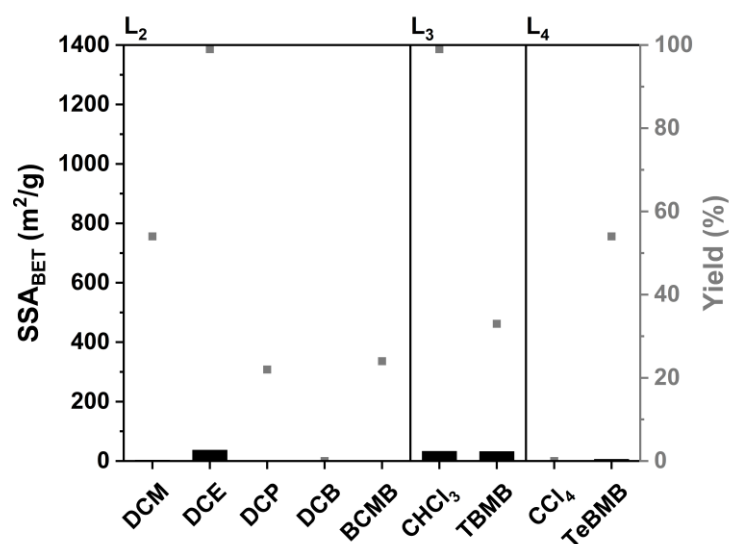

**Figure S25.** SSA<sub>BET</sub> (black bars) and yield (gray squares) for the polymerization of the monomer Triphenylmethane and various linkers. The linkers are divided into linkers with two linking points (L<sub>2</sub>), three linking points (L<sub>3</sub>) and four linking points (L<sub>4</sub>).

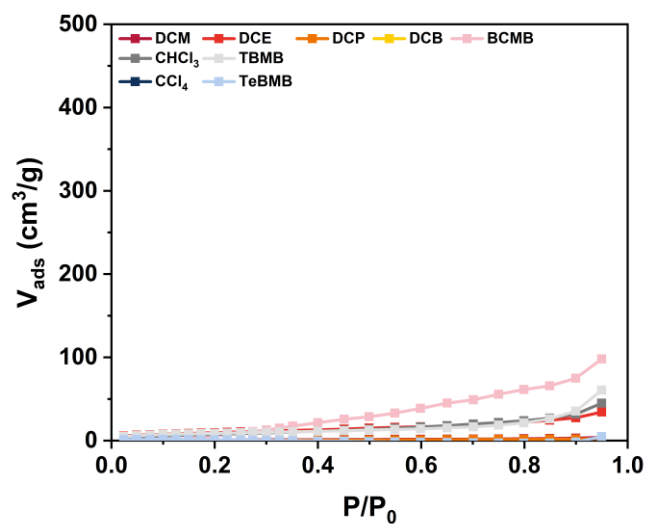

**Figure S26.** N<sub>2</sub> Physisorption measurements, showing the adsorption isotherms of polymers synthesized with Triphenylmethane as monomer and various linkers. The linkers used are: Dichloromethane (DCM; dark red), Dichloroethane (DCE, light red), Dichloropropane (DCP, orange), Dichlorobutane (DCB, yellow), Bis(chloromethyl)benzene (BCMB, pink), Chloroform (CHCl<sub>3</sub>, dark gray), Tris(bromomethyl)benzene (TBMB, light gray), Tetrachloromethane (CCl<sub>4</sub>, dark blue), and Tetrakis(bromomethyl)benzene (TeBMB, light blue).

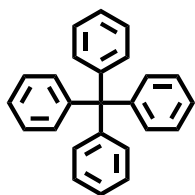

Tetraphenylmethane

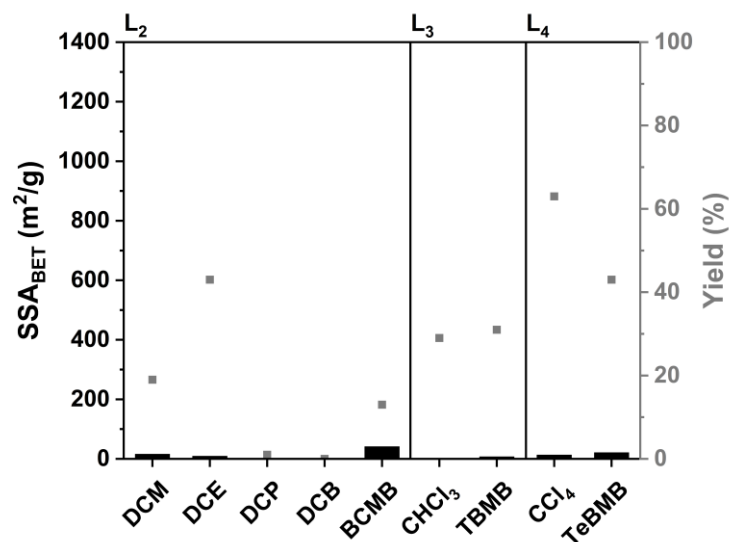

**Figure S27.** SSA<sub>BET</sub> (black bars) and yield (gray squares) for the polymerization of the monomer Tetraphenylmethane and various linkers. The linkers are divided into linkers with two linking points (L<sub>2</sub>), three linking points (L<sub>3</sub>) and four linking points (L<sub>4</sub>).

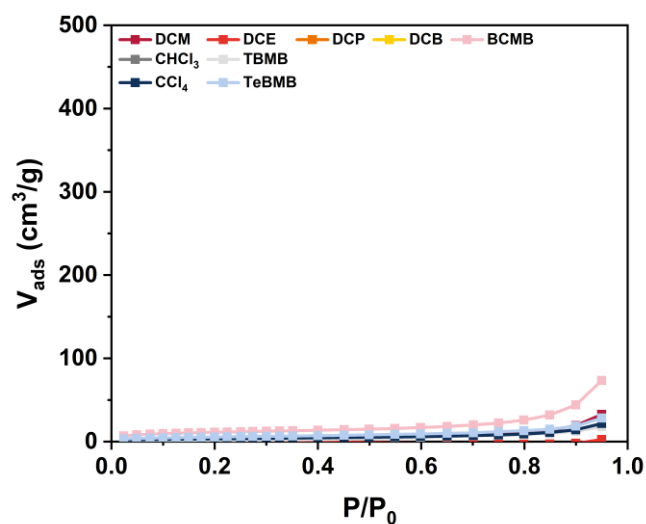

**Figure S28.** N<sub>2</sub> Physisorption measurements, showing the adsorption isotherms of polymers synthesized with Tetraphenylmethane as monomer and various linkers. The linkers used are: Dichloromethane (DCM; dark red), Dichloroethane (DCE, light red), Dichloropropane (DCP, orange), Dichlorobutane (DCB, yellow), Bis(chloromethyl)benzene (BCMB, pink), Chloroform (CHCl<sub>3</sub>, dark gray), Tris(bromomethyl)benzene (TBMB, light gray), Tetrachloromethane (CCl<sub>4</sub>, dark blue), and Tetrakis(bromomethyl)benzene (TeBMB, light blue).

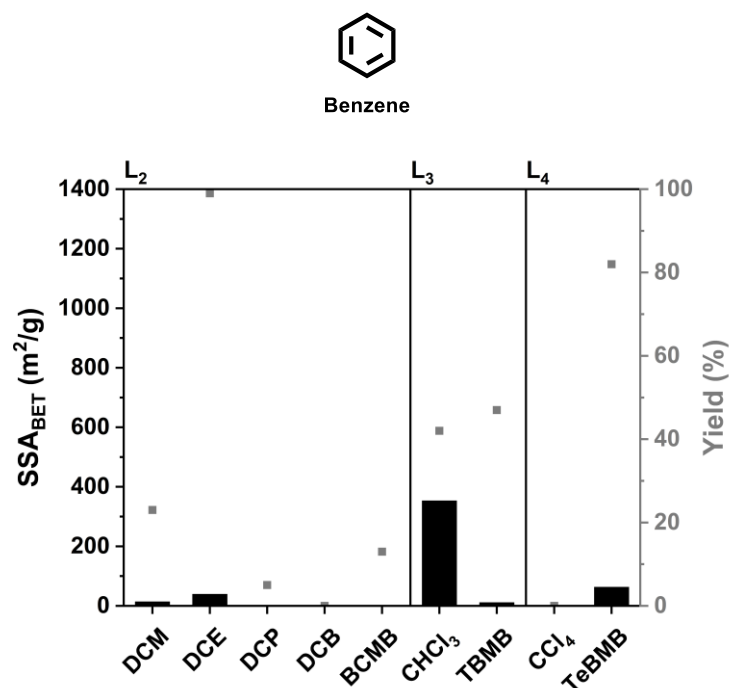

**Figure S29.** SSA<sub>BET</sub> (black bars) and yield (gray squares) for the polymerization of the monomer Benzene and various linkers. The linkers are divided into linkers with two linking points (L<sub>2</sub>), three linking points (L<sub>3</sub>) and four linking points (L<sub>4</sub>).

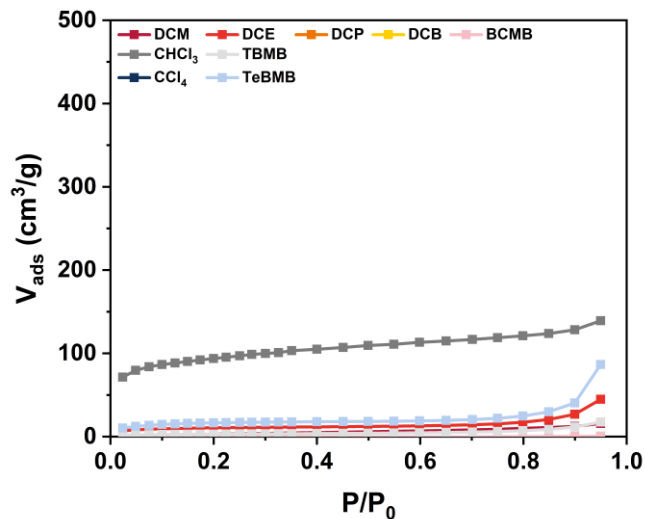

**Figure S30.** N<sub>2</sub> Physisorption measurements, showing the adsorption isotherms of polymers synthesized with Benzene as monomer and various linkers. The linkers used are: Dichloromethane (DCM; dark red), Dichloroethane (DCE, light red), Dichloropropane (DCP, orange), Dichlorobutane (DCB, yellow), Bis(chloromethyl)benzene (BCMB, pink), Chloroform (CHCl<sub>3</sub>, dark gray), Tris(bromomethyl)benzene (TBMB, light gray), Tetrachloromethane (CCl<sub>4</sub>, dark blue), and Tetrakis(bromomethyl)benzene (TeBMB, light blue).

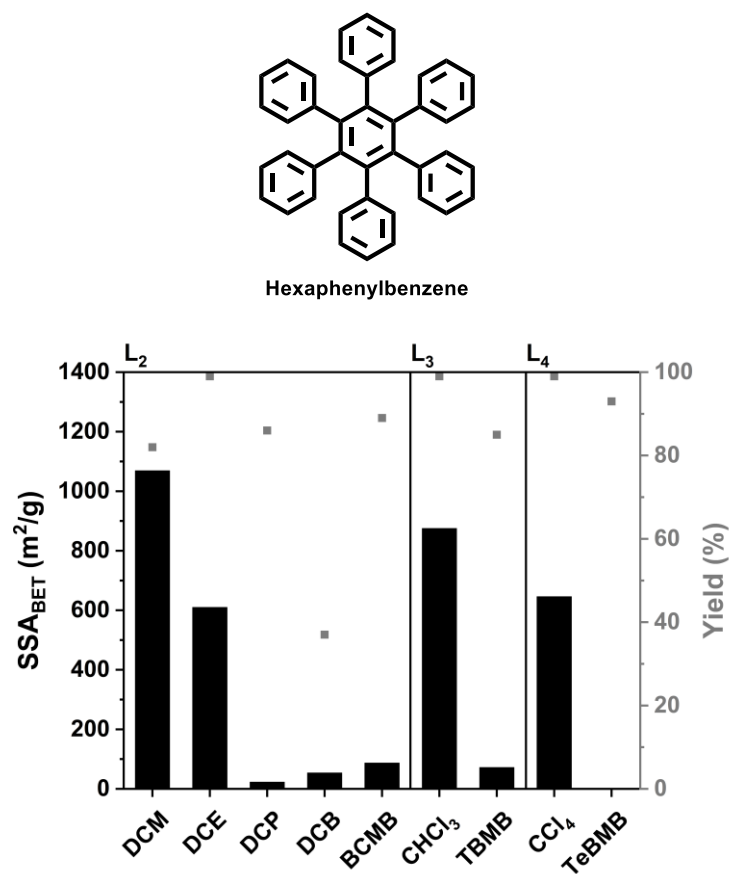

**Figure S31.** SSA<sub>BET</sub> (black bars) and yield (gray squares) for the polymerization of the monomer Hexaphenylbenzene and various linkers. The linkers are divided into linkers with two linking points (L<sub>2</sub>), three linking points (L<sub>3</sub>) and four linking points (L<sub>4</sub>).

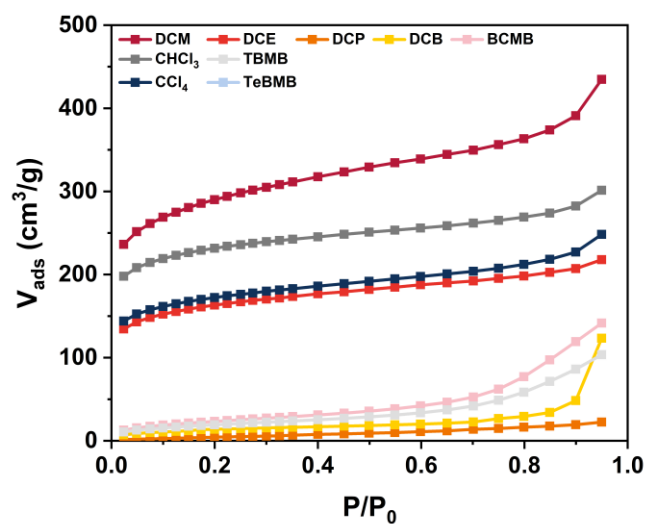

**Figure S32.** N<sub>2</sub> Physisorption measurements, showing the adsorption isotherms of polymers synthesized with Hexaphenylbenzene as monomer and various linkers. The linkers used are: Dichloromethane (DCM; dark red), Dichloroethane (DCE, light red), Dichloropropane (DCP, orange), Dichlorobutane (DCB, yellow), Bis(chloromethyl)benzene (BCMB, pink), Chloroform (CHCl<sub>3</sub>, dark gray), Tris(bromomethyl)benzene (TBMB, light gray), Tetrachloromethane (CCl<sub>4</sub>, dark blue), and Tetrakis(bromomethyl)benzene (TeBMB, light blue).

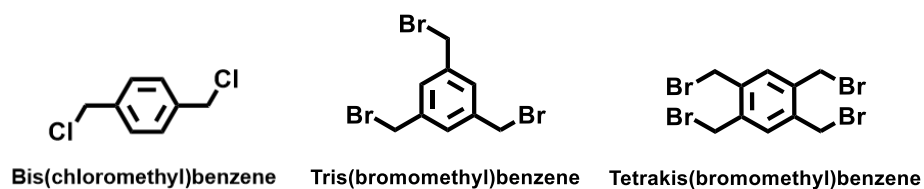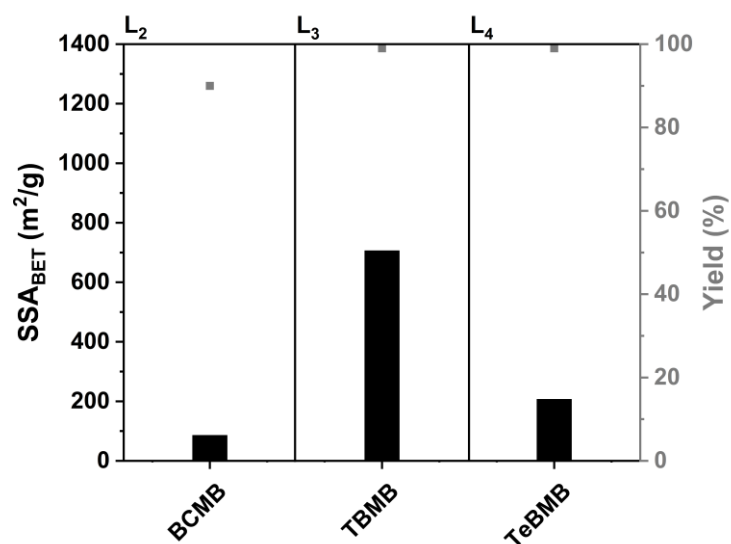

**Figure S33.** SSA<sub>BET</sub> (black bars) and yield (gray squares) for the self-polymerization of the solid linkers Bis(chloromethyl)benzene (BCMB), Tris(bromomethyl)benzene (TBMB) and Tetrakis(bromomethyl)benzene (TeBMB). The linkers are divided into linkers with two linking points (L<sub>2</sub>), three linking points (L<sub>3</sub>) and four linking points (L<sub>4</sub>).

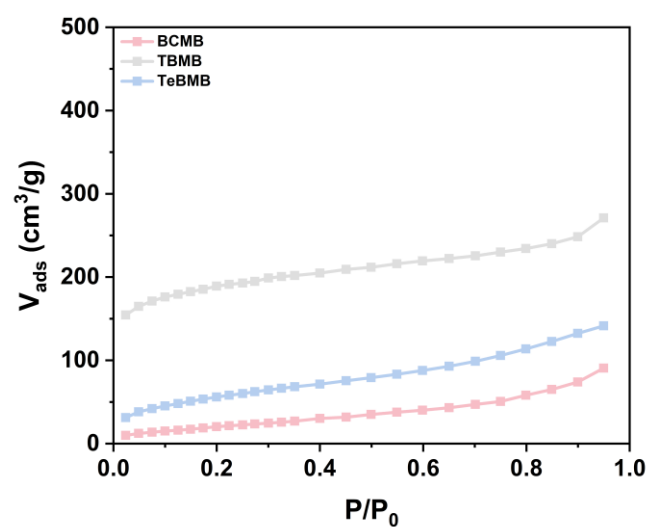

**Figure S34.** N<sub>2</sub> Physisorption measurements, showing the adsorption isotherms for the self-polymerization of the solid linkers. The linkers used are Bis(chloromethyl)benzene (BCMB, pink), Tris(bromomethyl)benzene (TBMB, light gray), and Tetrakis(bromomethyl)benzene (TeBMB, light blue).

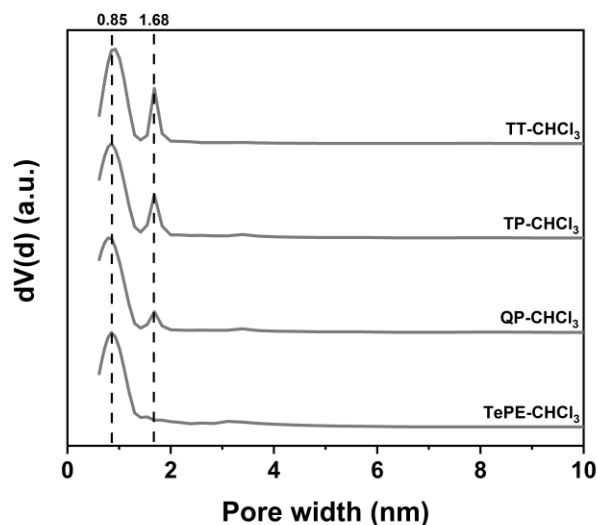

**Figure S35.** Pore size distributions for polymers featuring total pore volumes of  $>0.5 \text{ cm}^3/\text{g}$ , obtained by polymerization of  $\text{C}_2$  monomers. The polymers are comprising of a combination of the monomers Tetracene (TT), *p*-Terphenyl (TP), *p*-Quaterphenyl (QP) or Tetraphenylethene (TePE) and the linker Chloroform ( $\text{CHCl}_3$ , dark gray). As no kernel is available specifically for polymers, the pore size distributions were obtained by DFT calculation applying the calculation model  $\text{N}_2$  at 77 K on carbon (slit pore, QSDFT equilibrium model), to take surface roughness and heterogeneity into account. The pore widths are shown in a range between 0 and 10 nm.

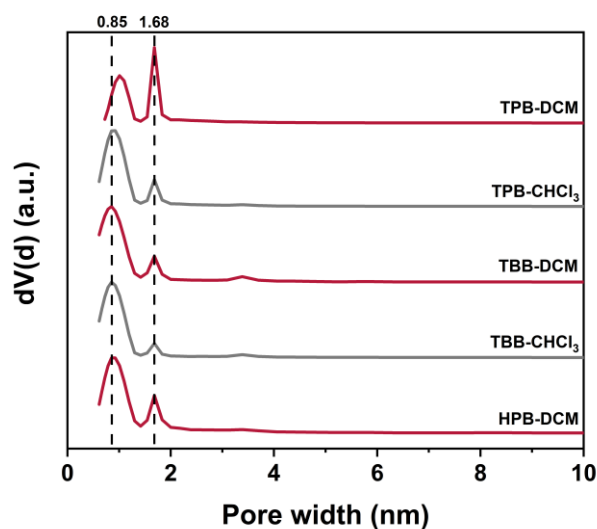

**Figure S36.** Pore size distributions for polymers featuring total pore volumes of  $>0.5 \text{ cm}^3/\text{g}$ , obtained by polymerization of  $\text{C}_3$  and  $\text{C}_6$  monomers. The polymers are comprising of a combination of the monomers Triphenylbenzene (TPB), Tris(*p*-biphenyl)benzene (TBB) or Hexaphenylbenzene (HPB) and the linkers Dichloromethane (DCM; dark red) or Chloroform ( $\text{CHCl}_3$ , dark gray). As no kernel is available specifically for polymers, the pore size distributions were obtained by DFT calculation applying the calculation model  $\text{N}_2$  at 77 K on carbon (slit pore, QSDFT equilibrium model), to take surface roughness and heterogeneity into account. The pore widths are shown in a range between 0 and 10 nm.

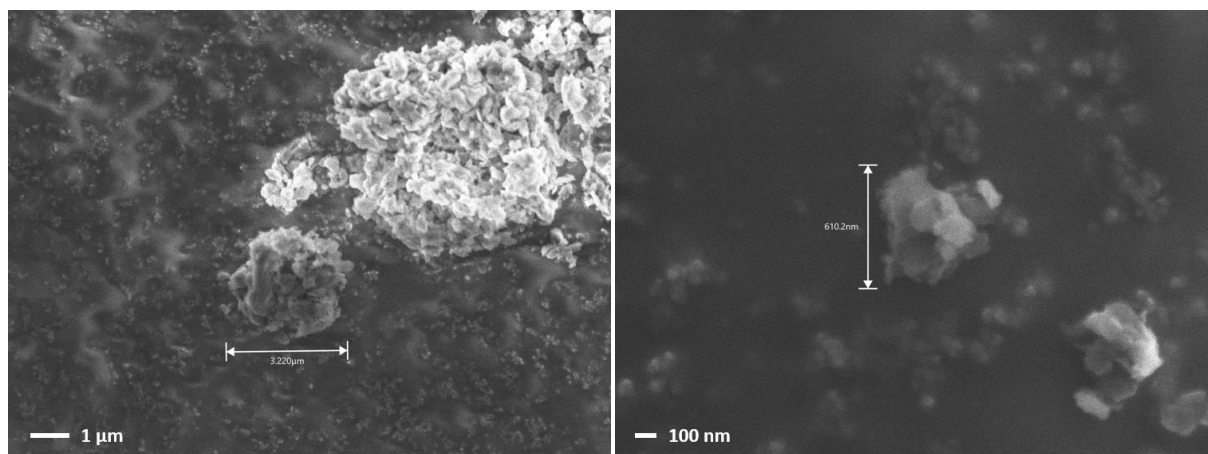

**Figure S37.** SEM image of the porous polymer TP-CHCl<sub>3</sub> in a magnification of 8 k (left) and of 43 k (right). Smaller particles are building broader agglomerates. The measured particle sizes are 3.220 μm (left) and 610.2 nm (right).

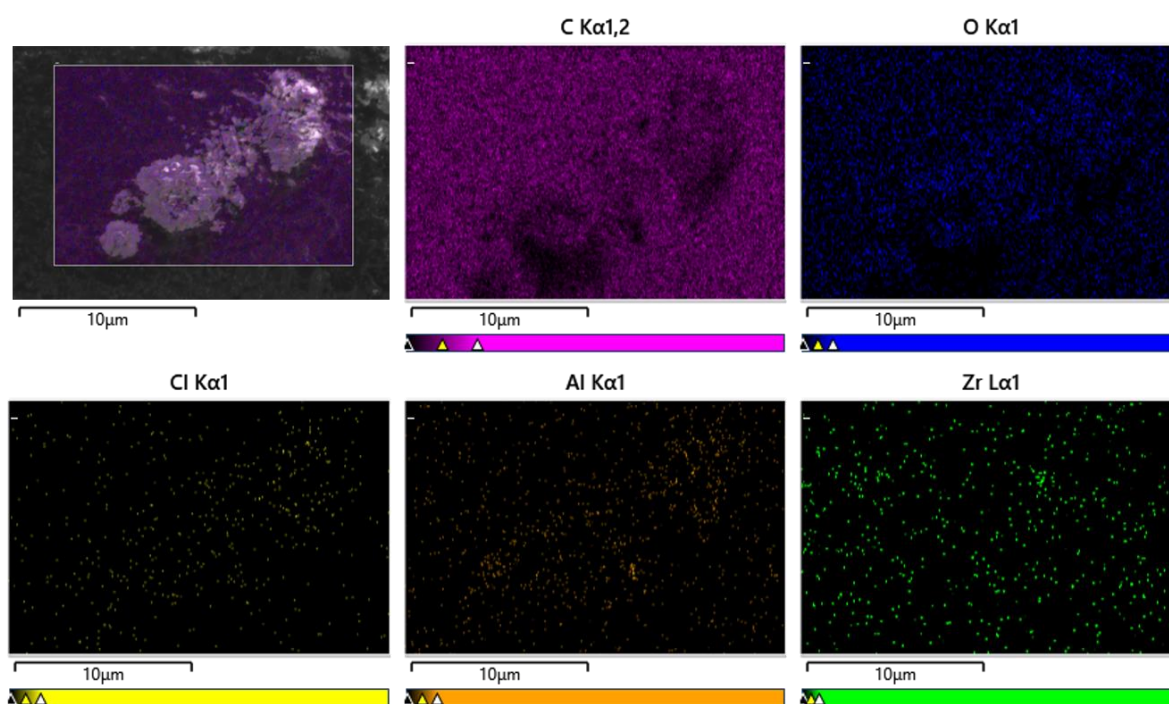

**Figure S38.** EDS analysis of the porous polymer TP-CHCl<sub>3</sub> showing the amount of carbon (purple), oxygen (blue), chlorine (yellow), aluminium (orange) and zirconium (green) in a specific particle.

**Table S10.** EDS analysis of TP-CHCl<sub>3</sub>.

|        | C     | O    | Cl   | Al   | Zr   |
|--------|-------|------|------|------|------|
| Mass % | 93.55 | 5.25 | 0.85 | 0.35 | 0.00 |
| Atom % | 95.52 | 4.03 | 0.29 | 0.16 | 0.00 |

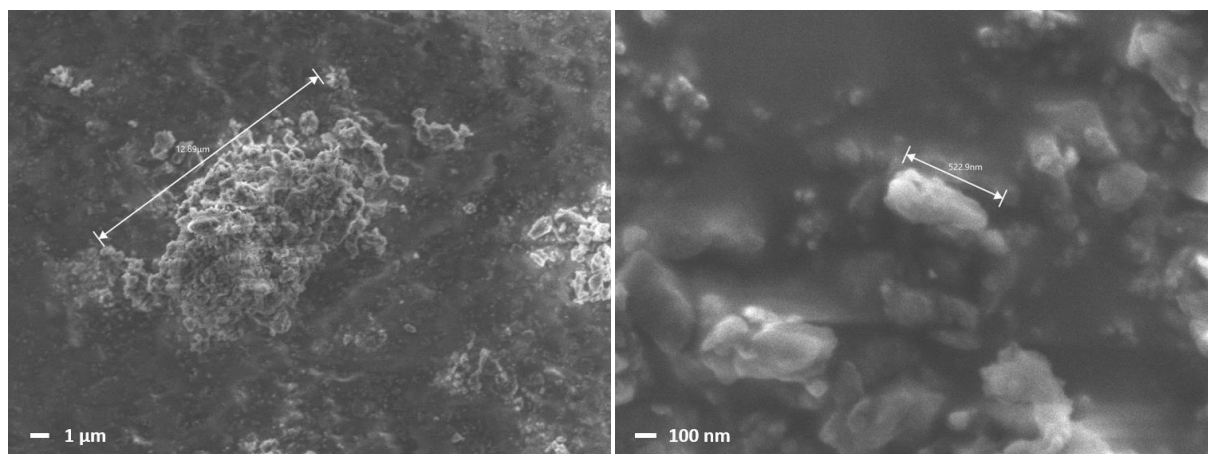

**Figure S39.** SEM image of the porous polymer TePE-CHCl<sub>3</sub> in a magnification of 4.5 k (left) and of 43 k (right). Smaller particles are building broader agglomerates. The measured particle sizes are 12.89 μm (left) and 522.9 nm (right).

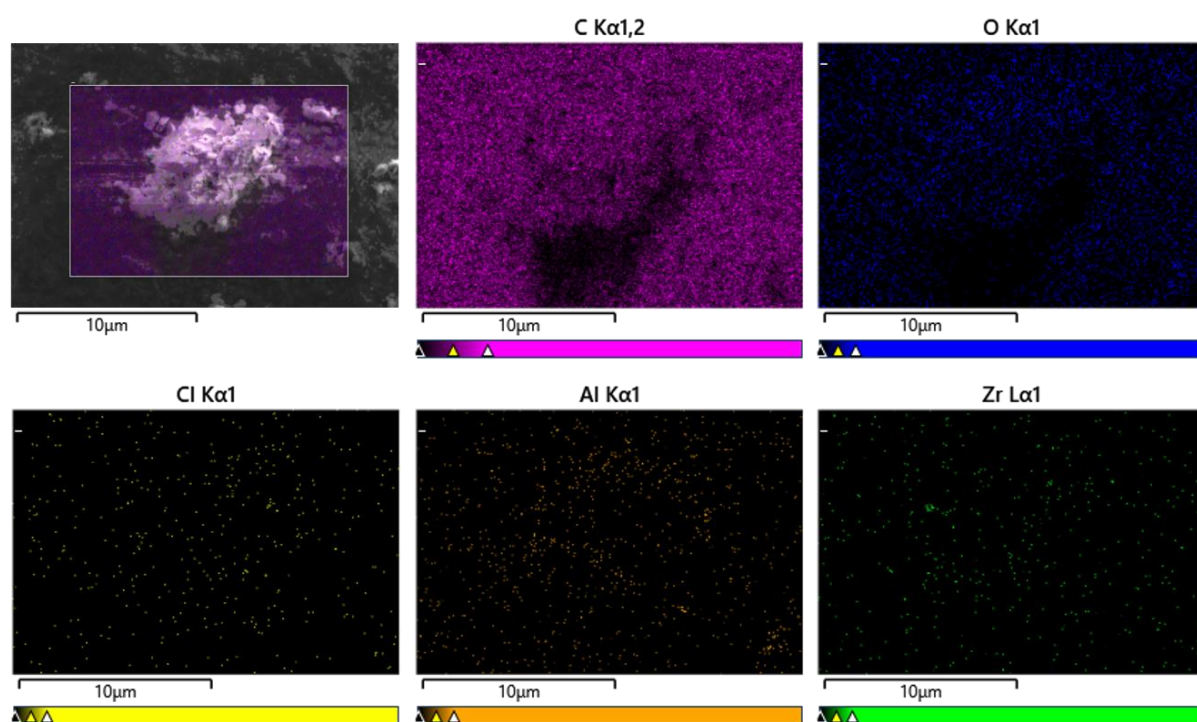

**Figure S40.** EDS analysis of the porous polymer TePE-CHCl<sub>3</sub> showing the amount of carbon (purple), oxygen (blue), chlorine (yellow), aluminium (orange) and zirconium (green) in a specific particle.

**Table S11.** EDS analysis of TePE-CHCl<sub>3</sub>.

|               | C     | O    | Cl   | Al   | Zr   |
|---------------|-------|------|------|------|------|
| <b>Mass %</b> | 94.18 | 4.75 | 0.71 | 0.36 | 0.00 |
| <b>Atom %</b> | 95.96 | 3.63 | 0.24 | 0.16 | 0.00 |

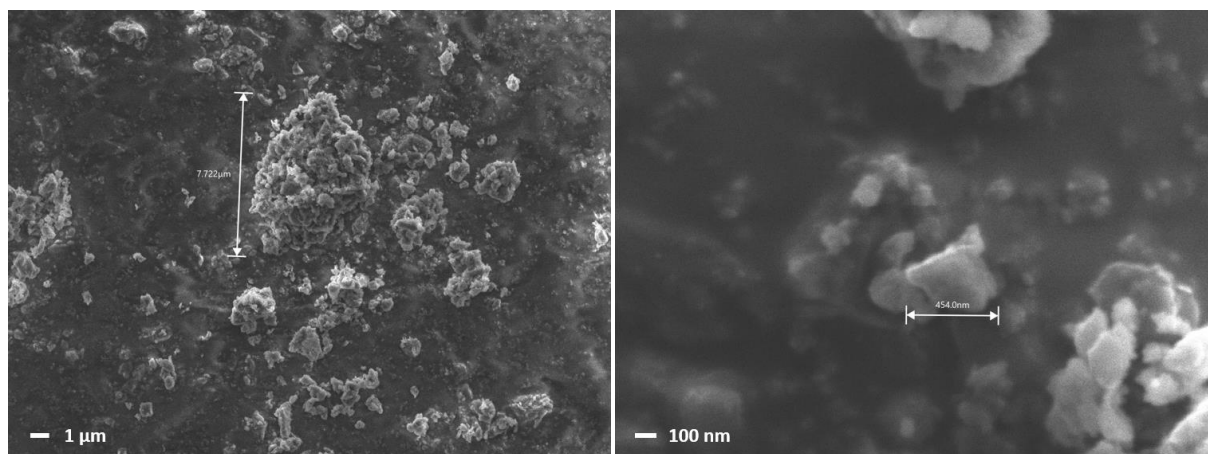

**Figure S41.** SEM image of the porous polymer TPB-CHCl<sub>3</sub> in a magnification of 4.5 k (left) and of 43 k (right). Smaller particles are building broader agglomerates. The measured particle sizes are 7.722 μm (left) and 454.0 nm (right).

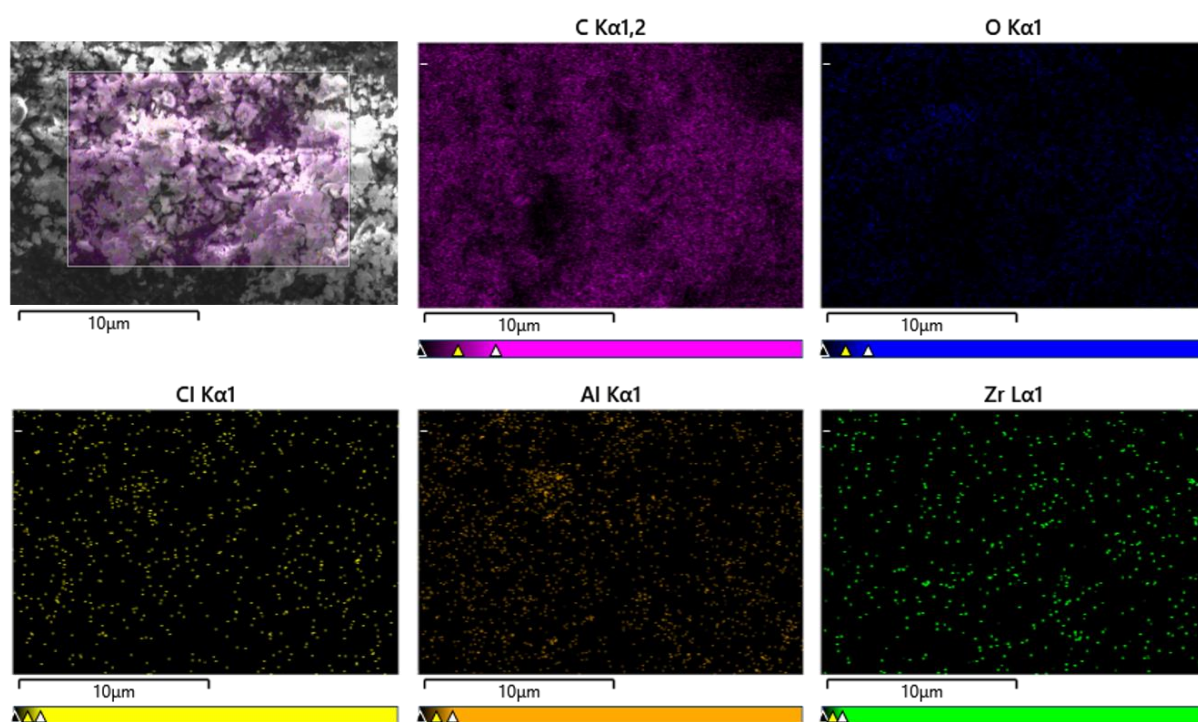

**Figure S42.** EDS analysis of the porous polymer TPB-CHCl<sub>3</sub> showing the amount of carbon (purple), oxygen (blue), chlorine (yellow), aluminium (orange) and zirconium (green) in a specific particle.

**Table S12.** EDS analysis of TPB-CHCl<sub>3</sub>.

|               | C     | O    | Cl   | Al   | Zr   |
|---------------|-------|------|------|------|------|
| <b>Mass %</b> | 90.47 | 5.98 | 2.01 | 1.54 | 0.00 |
| <b>Atom %</b> | 93.92 | 4.66 | 0.71 | 0.71 | 0.00 |

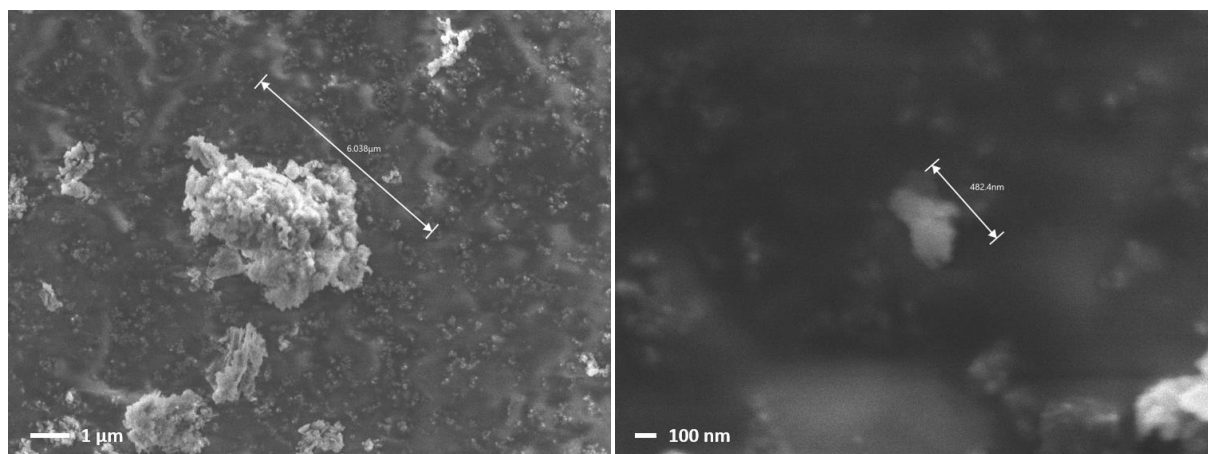

**Figure S43.** SEM image of the porous polymer HPB-DCM in a magnification of 8 k (left) and of 43 k (right). Smaller particles are building broader agglomerates. The measured particle sizes are 6.038  $\mu\text{m}$  (left) and 482.4 nm (right).

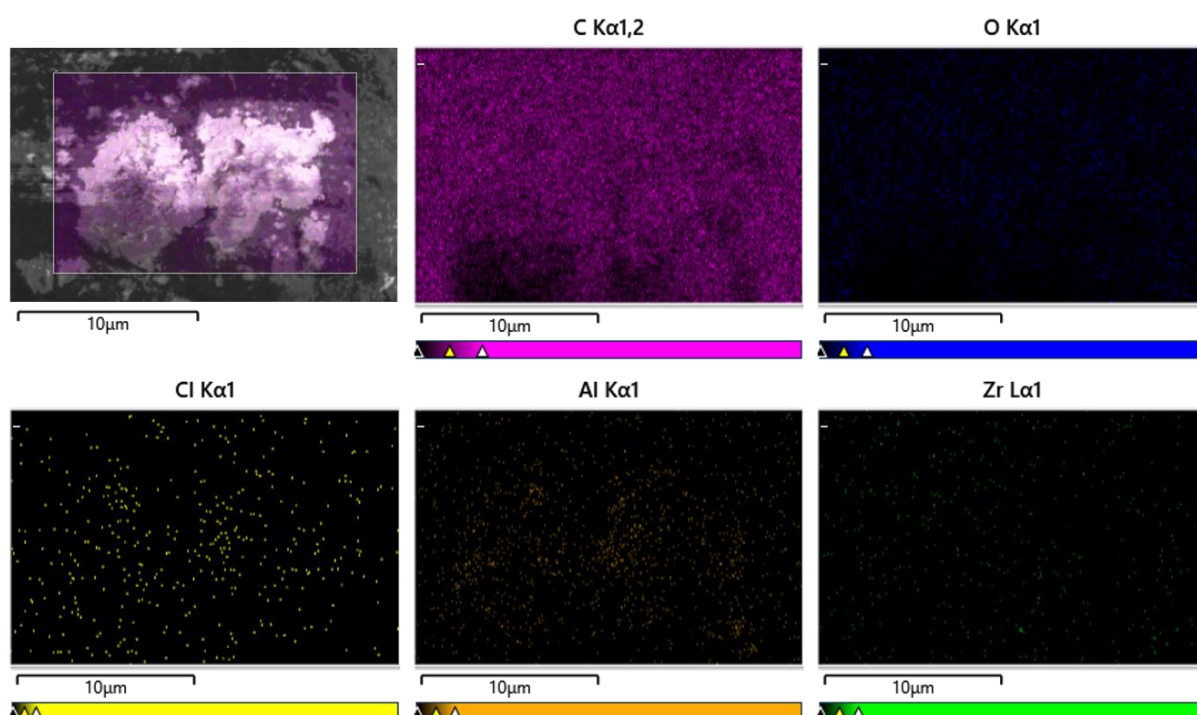

**Figure S44.** EDS analysis of the porous polymer HPB-DCM showing the amount of carbon (purple), oxygen (blue), chlorine (yellow), aluminium (orange) and zirconium (green) in a specific particle.

**Table S13.** EDS analysis of HPB-DCM.

|        | C     | O    | Cl   | Al   | Zr   |
|--------|-------|------|------|------|------|
| Mass % | 94.72 | 4.59 | 0.00 | 0.70 | 0.00 |
| Atom % | 96.19 | 3.50 | 0.00 | 0.32 | 0.00 |

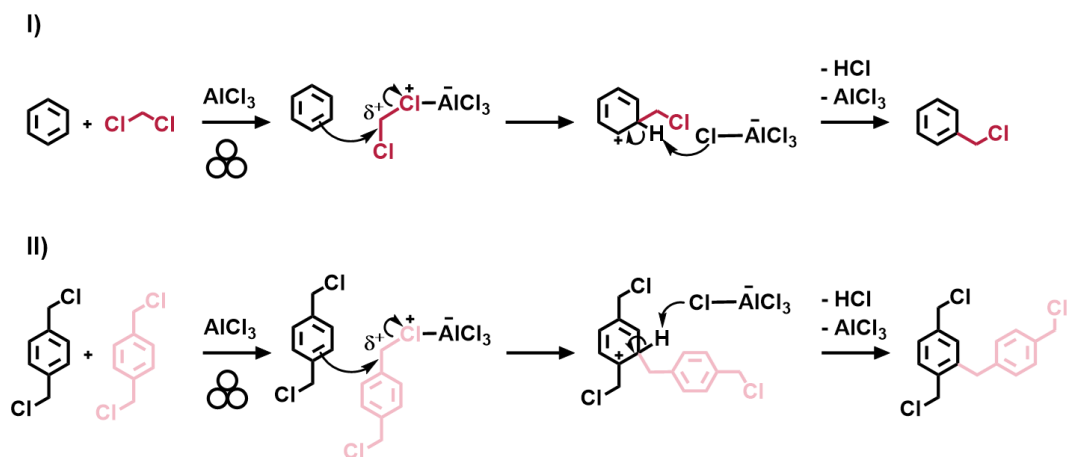

**Figure S45.** I) Scheme of the Friedel-Crafts reaction between a monomer and a linker, catalyzed by  $\text{AlCl}_3$ . The coordination of  $\text{AlCl}_3$  and the linker leads to a positive polarization at the adjacent carbon that can be attacked by the high electron density of the monomer and form a polymer under release of  $\text{HCl}$  and rearomatisation. II) Scheme of the self-polymerization of a solid linker on the example of Bis(chloromethyl)benzene (BCMB). The coordination of  $\text{AlCl}_3$  and the linker leads to a positive polarization at the adjacent carbon that can be attacked by the high electron density of another linker and form a polymer under release of  $\text{HCl}$  and rearomatisation.

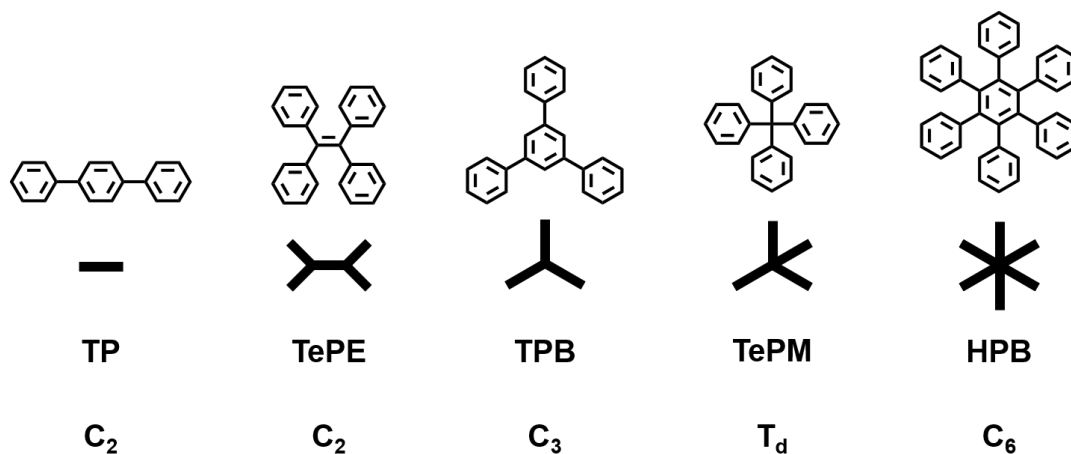

**Figure S46.** Schematic overview over the geometries of the  $\text{C}_2$  monomers *p*-Terphenyl (TP) and Tetraphenylethylene (TePE), the  $\text{C}_3$  monomer Triphenylbenzene (TPB), the  $\text{T}_d$  monomer Tetraphenylmethane (TePM) and the  $\text{C}_6$  monomer Hexaphenylbenzene (HPB).

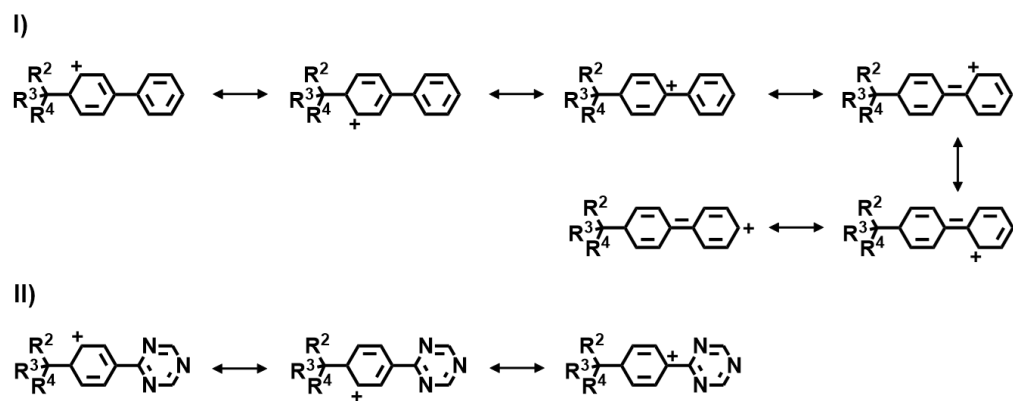

**Figure S47.** Resonance structures of the carbenium intermediate for the polymerization of I) the model compound Biphenyl (BP) for Triphenylbenzene (TPB) and of II) the model compound Phenyltriazine (PT) for Triphenyltriazine (TPT).
